# Complexity of cyanobacterial exopolysaccharides: composition, structures, inducing factors and putative genes involved in their biosynthesis and assembly

Sara Pereira<sup>1,2</sup>, Andrea Zille<sup>1</sup>, Ernesto Micheletti<sup>3</sup>, Pedro Moradas-Ferreira<sup>1,4</sup>, Roberto De Philippis<sup>3</sup> & Paula Tamagnini<sup>1,2</sup>

<sup>1</sup>IBMC – Instituto de Biologia Molecular e Celular, Universidade do Porto, Porto, Portugal; <sup>2</sup>Departamento de Botânica, Faculdade de Ciências, Universidade do Porto, Porto, Portugal; <sup>3</sup>Department of Agricultural Biotechnology, University of Florence, Florence, Italy; and <sup>4</sup>Instituto de Ciências Biomédicas Abel Salazar (ICBAS), Universidade do Porto, Porto, Portugal

**Correspondence:** Paula Tamagnini, IBMC – Instituto de Biologia Molecular e Celular, Universidade do Porto, Rua do Campo Alegre, 823, 4150-180 Porto, Portugal. Tel.: +35 122 607 4900; fax: +35 122 609 9157; e-mail: pmtamagn@ibmc.up.pt

Received 14 November 2008; revised 6 April 2009; accepted 12 April 2009.  
Final version published online 11 May 2009.

DOI:10.1111/j.1574-6976.2009.00183.x

Editor: Ferran Garcia-Pichel

## Keywords

cyanobacteria; exopolysaccharides; extracellular polymeric substance biosynthesis; extracellular polymeric substances; released polysaccharides.

## Introduction

A wide range of bacteria are able to synthesize and secrete extracellular polymeric substances (EPS) (Neu & Marshall, 1990), mainly of polysaccharidic nature, which can remain covalently linked or loosely attached to the cell surface, or be released into the surrounding environment (De Philippis & Vincenzini, 2003). These exopolysaccharides can be divided into two groups: homopolysaccharides and heteropolysaccharides (Sutherland, 2001). The homopolysaccharides are composed of only one type of monosaccharide, and are synthesized from sucrose by the action of a sucrose. The heteropolysaccharides consist of high-molecular-mass hydrated molecules made up of different sugar residues, and are synthesized by the combined action of different types of glycosyltransferases (De Vuyst & Degeest, 1999; De Vuyst *et al.*, 2001; Van Hijum *et al.*, 2006; Arskold *et al.*, 2007). These complex polymers can also contain acetylated amino

## Abstract

Cyanobacterial extracellular polymeric substances (EPS) are mainly composed of high-molecular-mass heteropolysaccharides, with variable composition and roles according to the microorganism and the environmental conditions. The number of constituents – both saccharidic and nonsaccharidic – and the complexity of structures give rise to speculations on how intricate their biosynthetic pathways could be, and how many genes may be involved in their production. However, little is known regarding the cyanobacterial EPS biosynthetic pathways and regulating factors. This review organizes available information on cyanobacterial EPS, including their composition, function and factors affecting their synthesis, and from the *in silico* analysis of available cyanobacterial genome sequences, proposes a putative mechanism for their biosynthesis.

sugar moieties, as well as noncarbohydrate constituents such as phosphate, lactate, acetate and glycerol (De Vuyst & Degeest, 1999; De Vuyst *et al.*, 2001; Ruas-Madiedo *et al.*, 2002; Girard & Schaffer-Lequart, 2007). The composition of the bacterial EPS varies with the type of microorganism (Vaningelgem *et al.*, 2004; Panhota *et al.*, 2007), nutrient availability (De Vuyst & Degeest, 1999; Ricciardi *et al.*, 2002), growth phase and environmental conditions (Fischer *et al.*, 2003; Bahat-Samet *et al.*, 2004). However, the mechanisms involved in the synthesis of EPS seem to be relatively conserved for Gram-negative and Gram-positive bacteria (De Vuyst *et al.*, 2001; Jolly & Stinglee, 2001; Laws *et al.*, 2001; Sutherland, 2001; Welman & Maddox, 2003; Whitfield, 2006). In terms of biotechnological applications, bacterial EPS are a good alternative to the polysaccharides of plant and algal origin due to the higher growth rates of the producing bacteria, the reproducible physicochemical properties of their EPS, the easier manipulation of these

properties by genetically engineering the producing microorganisms, the presence of novel functionalities and the overall economical costs of producing them (Selbmann *et al.*, 2002; Parikh & Madamwar, 2006). This versatility could be useful in a wide range of applications in many industrial sectors such as textiles, detergents, adhesives, oil recovery, wastewater treatment, dredging, brewing, downstream processing, cosmetology, pharmacology and food additives.

Cyanobacteria are a large and widespread group of photoautotrophic microorganisms that combine the ability to perform oxygenic photosynthesis (similar to that of the chloroplasts) with typical prokaryotic features (Whitton & Potts, 2000). Certain strains also have the ability to fix atmospheric dinitrogen, thus displaying the simplest nutritional requirements (Fay, 1992; Bergman *et al.*, 1997). They possess a unique cell wall that combines the presence of an outer membrane and lipopolysaccharides, as in Gram-negative bacteria, with a thick and highly cross-linked peptidoglycan layer similar to Gram-positive bacteria (Hoiczyc & Hansel, 2000; Stewart *et al.*, 2006). Moreover, many cyanobacterial strains have polysaccharidic structures surrounding their cells (De Philippis & Vincenzini, 2003). However, a lack of information regarding both the genes encoding the proteins involved in the EPS biosynthetic pathways, and the factors controlling these processes strongly limits their potential for biotechnological applications (Morvan *et al.*, 1997; Otero & Vincenzini, 2003; Potts, 2004).

The aim of this review is to summarize the current knowledge on the composition and the macromolecular characteristics of the cyanobacterial exopolysaccharides. We consider their ecological role and the factors that may affect their synthesis, as well as analyze the available genome sequences to gather information on the genes encoding products putatively involved in the production of EPS in cyanobacteria.

### Composition and macromolecular characteristics of cyanobacterial exopolysaccharides

The cyanobacterial EPS can be divided in two main groups: the ones associated with the cell surface and the polysaccharides released into the surrounding environment (released polysaccharides, RPS). The EPS associated with the cell surface can be referred to as sheaths, capsules and slimes, according to their thickness, consistency and appearance (De Philippis & Vincenzini, 1998, 2003). The sheath is defined as a thin, dense layer loosely surrounding cells or cell groups usually visible in light microscopy without staining. The capsule generally consists of a thick and slimy layer intimately associated with the cell surface with sharp outlines, which is structurally coherent, excluding particles (e.g. India ink). The slime refers to the mucilaginous material dispersed around the organism but not reflecting

the shape of the cells. The RPS are soluble aliquots of polysaccharidic material released into the medium, either from the external layer(s) or derived from a biosynthetic process not directly related to the synthesis of EPS. Despite some evidence, this last point is still controversial. Differences in the sulphur content and in the monosaccharidic composition reported for the sheath and RPS of some cyanobacteria strongly support the hypothesis of different biosynthetic pathways (Tease *et al.*, 1991; Ortega-Calvo & Stal, 1994; Li *et al.*, 2002; Micheletti *et al.*, 2008b). However, further studies are needed to fully elucidate these pathways in cyanobacteria.

The RPS can be easily recovered from liquid cultures and, due to their physicochemical properties, are suitable for a variety of industrial applications, making cyanobacteria one of the most attractive sources of new polymers (De Philippis & Vincenzini, 1998, 2003). The available data on the monosaccharidic composition of cyanobacterial EPS (Table 1) reveal some peculiar features of these polymers when compared with those produced by other microorganisms, such as the presence of one or two uronic acids, constituents rarely found in the EPS produced by other microbial groups. Cyanobacterial EPS also contain sulphate groups, a feature unique among bacteria, but shared by the EPS produced by archaea and eukaryotes. Both the sulphate groups and the uronic acids contribute to the anionic nature of the EPS, conferring a negative charge and a 'sticky' behaviour to the overall macromolecule (Decho, 1990; Sutherland, 1994; Leppard *et al.*, 1996; Arias *et al.*, 2003; De Philippis & Vincenzini, 2003; Mancuso Nichols *et al.*, 2005). The anionic charge is an important characteristic for the affinity of these EPS towards cations, notably metal ions. However, the ability to chelate metal ions is related not only to the amount of charged groups but also to their distribution on the macromolecules and their accessibility (Brown & Lester, 1982; De Philippis *et al.*, 2000; Mancuso Nichols *et al.*, 2005; Micheletti *et al.*, 2008b). On the other hand, many cyanobacterial EPS are also characterized by a significant level of hydrophobicity, which is due to the presence of ester-linked acetyl groups (up to 12% of EPS dry weight), peptidic moieties and deoxysugars such as fucose and rhamnose (Table 1). The presence of these hydrophobic groups contributes significantly to the emulsifying properties of the polysaccharides, which would otherwise be highly hydrophilic, and it is also essential for determining their rheological properties (Neu *et al.*, 1992; Shepherd *et al.*, 1995).

Cyanobacterial EPS are complex heteropolysaccharides, with *c.* 75% of the polymers described so far composed of six or more different kinds of monosaccharides. This feature contrasts with the polymers synthesized by other bacteria or macroalgae, which contain a lower number of different monomers, usually less than four (De Philippis & Vincenzini, 1998). To date, up to 12 different monosaccharides have

**Table 1a.** Main constituents of EPS produced by unicellular cyanobacteria

| Unicellular organisms                                  | Ecological origin                | No. of mono-saccharides | Ww/EPS dry weight (%)    |              |          |          | Peptides | References                        |
|--------------------------------------------------------|----------------------------------|-------------------------|--------------------------|--------------|----------|----------|----------|-----------------------------------|
|                                                        |                                  |                         | Uronic acids             | Deoxy-sugars | Sulphate | Pyruvate |          |                                   |
| <i>Aphanocapsa halophytia</i> MN-11                    | Saline lake, Japan               | 6                       | 0                        | 52.4         | 11.9     |          | 10.3     | Sudo <i>et al.</i> (1995)         |
| <i>Aphanothece halophytica</i> GR02                    | Saltworks, China                 | 7                       | 14.1                     | 27.8         | 0        |          | 0        | Li <i>et al.</i> (2001)           |
| <i>Aphanothece sacrum</i> (Sur.) Okada*                | Freshwater spring, Japan         | 4                       |                          | p            |          |          |          | Kabata <i>et al.</i> (2005)       |
| <i>Chroococcus minutus</i> B 41.79                     | Water reservoir, India           | 14                      | 4.2                      | 17.1         |          |          | 3.2      | Fischer <i>et al.</i> (1997)      |
| <i>Chroococcus submarinus</i> †                        | Brackish ponds, French Polynesia | 10                      | 10                       | 24.4         | 14       |          | 14       | Richert <i>et al.</i> (2005)      |
| <i>Cyanothece</i> 16Som2                               | Saltworks, Somalia               | 7                       | 20.6                     | 8.2          | p        | 0        | 0        | De Philippis & Vincenzini (1998)  |
| <i>Cyanothece</i> CA3                                  | Hypersaline ponds, Italy         | 7                       | 66.8                     | 23.2         | p        | 2.7      | 0.6      | De Philippis & Vincenzini (1998)  |
| <i>Cyanothece</i> CE4                                  | Saltworks, Italy                 | 7                       | 80.1                     | 36.6         | p        | 0.4      | 0.7      | De Philippis & Vincenzini (1998)  |
| <i>Cyanothece</i> CE9                                  | Saltworks, Italy                 | 6                       | 35.7                     | 33.5         | p        | 1.2      | 0.0      | De Philippis & Vincenzini (1998)  |
| <i>Cyanothece</i> CH1                                  | Saltworks, Greece                | 6                       | 27.4                     | 39.4         | p        | 1        | 0.5      | De Philippis & Vincenzini (1998)  |
| <i>Cyanothece</i> ET2                                  | Alkaline lake, Ethiopia          | 8                       | 63.1                     | 21.5         | 0        | 2.3      | 4.2      | De Philippis & Vincenzini (1998)  |
| <i>Cyanothece</i> ET5                                  | Alkaline lake, Ethiopia          | 8                       | 29.4                     | 22.3         | 0        | 0.4      | 2.5      | De Philippis & Vincenzini (1998)  |
| <i>Cyanothece</i> IR20                                 | Hypersaline lake, Israel         | 7                       | 9.8                      | 80.2         | p        | 2.1      | 0.8      | De Philippis & Vincenzini (1998)  |
| <i>Cyanothece</i> PE13                                 | Tidal pool, Greece               | 8                       | 20.9                     | 8.9          | p        | 2.1      | 0        | De Philippis & Vincenzini (1998)  |
| <i>Cyanothece</i> PE14                                 | Tidal pool, Greece               | 7                       | 21.7                     | 4.4          | p        | 0.2      | 0.3      | De Philippis & Vincenzini (1998)  |
| <i>Cyanothece</i> sp. ATCC 51142                       | Intertidal area, Texas           | 3                       | 0                        | 0            | p        |          | 18.3     | Parikh & Madamwar (2006)          |
| <i>Cyanothece</i> sp. 113                              | Sea, China                       | 1                       | 0                        | 0            |          |          | 0        | Chi <i>et al.</i> (2007)          |
| <i>Cyanothece</i> sp. PCC 8801                         | Rice fields, Taiwan              | 8                       | 35                       | 33.3         |          | 0.5      | 1.4      | De Philippis & Vincenzini (1998)  |
| <i>Cyanothece</i> TI4                                  | Hypersaline pond, Italy          | 7                       | 58.2                     | 39.9         | p        | 1.4      | 1        | De Philippis & Vincenzini (1998)  |
| <i>Cyanothece</i> TP10                                 | Saltworks, Italy                 | 7                       | 31.3                     | 42.7         | p        | 3.9      |          | De Philippis & Vincenzini (1998)  |
| <i>Cyanothece</i> TP5                                  | Saltworks, Italy                 | 6                       | 40.4                     | 57.5         | p        | 1.1      | 0        | De Philippis & Vincenzini (1998)  |
| <i>Cyanothece</i> VI13                                 | Tidal pool, Italy                | 8                       | 32.1                     | 37.2         | p        | 0.3      | 0        | De Philippis & Vincenzini (1998)  |
| <i>Cyanothece</i> VI22                                 | Tidal pool, Italy                | 7                       | 40.8                     | 31.7         | p        | 0.2      | 0.6      | De Philippis & Vincenzini (1998)  |
| <i>Gloeocapsa gelatinosa</i>                           | Unknown                          | 10                      | 31.4                     | 14.2         |          |          | 28.2     | Raungsomboon <i>et al.</i> (2006) |
| <i>Gloeothece</i> sp. PCC 6909                         | Unknown                          | 6                       | 5                        | 3            | 13.8     |          | 6.2      | Tease <i>et al.</i> (1991)        |
| <i>Johannesbaptistia pellucida</i> †                   | Brackish ponds, French Polynesia | 9                       | 5                        | 7.6          | 19       |          | 10       | Richert <i>et al.</i> (2005)      |
| <i>Microcystis aeruginosa</i> †                        | Water reservoir, Brazil          | 8                       | 8.9                      | 28.3         |          |          |          | Gouvea <i>et al.</i> (2005)       |
| <i>Microcystis aeruginosa</i> f. <i>aeruginosa</i>     | Unknown                          | 4                       | 5.2 µg mg <sup>-1</sup>  | 64.6         |          |          |          | Forni <i>et al.</i> (1997)        |
| <i>Microcystis aeruginosa</i> f. <i>flos-aquae</i>     | Unknown                          | 3                       | 2.6 µg mg <sup>-1</sup>  | 0            |          |          |          | Forni <i>et al.</i> (1997)        |
| <i>Microcystis flos-aquae</i> C3-40                    | Unknown                          | 6                       | 83                       | 5.5          |          |          | < 1      | Plude <i>et al.</i> (1991)        |
| <i>Microcystis</i> PCC 7005                            | Lake, Wisconsin                  | 4                       | 0.05 µg mg <sup>-1</sup> | 15.7         |          |          |          | Forni <i>et al.</i> (1997)        |
| <i>Microcystis</i> PCC 7941                            | Lake, Canada                     | 4                       | 0.04 µg mg <sup>-1</sup> | tr           |          |          |          | Forni <i>et al.</i> (1997)        |
| <i>Microcystis</i> sp.                                 | Water reservoir, Taiwan          | 5                       | P                        | p            |          |          |          | Huang <i>et al.</i> (2007)        |
| <i>Microcystis viridis</i>                             | Unknown                          | 6                       | 5.8 µg mg <sup>-1</sup>  | 7.3          |          |          |          | Forni <i>et al.</i> (1997)        |
| <i>Microcystis wesenbergii</i>                         | Unknown                          | 1                       | 100                      | 0            |          |          |          | Forni <i>et al.</i> (1997)        |
| <i>Rhabdoderma rubrum</i> †                            | Brackish ponds, French Polynesia | 8                       | 2                        | 8.7          | 13       |          | 7        | Richert <i>et al.</i> (2005)      |
| <i>Synechococcus elongatus</i> f. <i>A. nidulans</i> † | Lake, Ohio                       | 3                       | 0                        | 0            |          |          |          | Sangar & Dugan (1972)             |
| <i>Synechocystis</i> sp. PCC 6714                      | Freshwater, California           | 11                      | 16.7                     | 31.4         | 1.2      | 0        | 20       | Panoff <i>et al.</i> (1988)       |
| <i>Synechocystis</i> sp. PCC 6803                      | Freshwater, California           | 12                      | 16.4                     | 6.7          | 1.0      | 0        | 40       | Panoff <i>et al.</i> (1988)       |

The cyanobacteria are sourced from a culture collection unless specified otherwise.

\*Field sample.

†Monocyanobacterial culture.

p, present, but not quantified; tr, trace.

**Table 1b.** Main constituents of EPS produced by filamentous cyanobacteria

| Filamentous organisms                 | Ecological origin                                   | No. of mono-saccharides | Wt/EPS dry weight (%) |             |          |          |         | References                  |
|---------------------------------------|-----------------------------------------------------|-------------------------|-----------------------|-------------|----------|----------|---------|-----------------------------|
|                                       |                                                     |                         | Uronic acids          | Deoxysugars | Sulphate | Pyruvate | Acetate |                             |
| <i>Geitlerinema</i> sp.*              | Brackish ponds, French Polynesia                    | 4                       | 6                     | tr          | 0        |          | 8       | Richert et al. (2005)       |
| <i>Leptolyngbya</i> sp. VRUC 135      | Domus Aurea, Italy                                  | 5                       | 0                     | 3           |          |          |         | Piro et al. (2005)          |
| <i>Lyngbya confervoides</i> S9g       | Surface of <i>Lithophyllum lichenoides</i> , France | 9                       | 38.6                  | tr          |          |          |         | Gloaguen et al. (1995)      |
| <i>Microcoleus</i> sp.*               | Sand dunes, Israel                                  | 5                       | 0                     | p           |          |          | 6.0     | Mazor et al. (1996)         |
| <i>Microcoleus vaginatus</i> *        | Desert algal crusts, China                          | 10                      | 8                     | 9.9         |          |          | 50.3    | Hu et al. (2003a)           |
| <i>Oscillatoria amphibia</i> PCC 7105 | Unknown marine habitat                              | 8                       | 6.7                   | 4.5         | 9.1      |          |         | Gloaguen et al. (1995)      |
| <i>Oscillatoria corallinae</i> CJ1    | Leaves of <i>Posidonia Oceanica</i> , France        | 9                       | 24.2                  | 5.1         | 19.3     |          |         | Gloaguen et al. (1995)      |
| <i>Oscillatoria</i> sp.†              | Microbial mats, Florida                             | 10                      | 4.6                   | 15.9        |          |          |         | Bender et al. (1994)        |
| <i>Oscillatoria</i> sp.               | Pantelleria Island, Italy                           | 5                       | p                     | 1           |          |          |         | Nicolaus et al. (1999)      |
| <i>Oscillatoria</i> sp.               | Contaminated soil, India                            | 3                       | 0                     | 0           | 0        |          | 34.4    | Parikh & Madamwar (2006)    |
| <i>Oscillatoria</i> sp.               | Water reservoir, Taiwan                             | 3                       | 0                     | p           |          |          |         | Huang et al. (2007)         |
| <i>Phormidium ectocarpi</i> ME3       | Marine habitat                                      | 9                       | 18.9                  | 2.7         | 15.2     |          |         | Gloaguen et al. (1995)      |
| <i>Phormidium ectocarpi</i> C86       | Marine habitat                                      | 7                       | 29.9                  | tr          | 12.2     |          |         | Gloaguen et al. (1995)      |
| <i>Phormidium ectocarpi</i> K5        | Marine habitat                                      | 9                       | 28.7                  | 1.8         | 12.4     |          |         | Gloaguen et al. (1995)      |
| <i>Phormidium ectocarpi</i> N182      | Marine habitat                                      | 6                       | 28.7                  | tr          | 13.6     |          |         | Gloaguen et al. (1995)      |
| <i>Phormidium ectocarpi</i> PCC7375   | Marine plankton, Massachusetts                      | 8                       | 41.5                  | 10.4        |          |          |         | Gloaguen et al. (1995)      |
| <i>Phormidium foveolarum</i>          | unknown                                             | 9                       | p                     | 17.4        |          |          |         | Matulewicz et al. (1984)    |
| <i>Phormidium foveolarum</i> C52      | Marine habitat                                      | 9                       | 29.4                  | 2           | 11.2     |          |         | Gloaguen et al. (1995)      |
| <i>Phormidium foveolarum</i> MEU      | Freshwater                                          | 8                       | 0.5                   | 9.8         | 0.5      |          |         | Gloaguen et al. (1995)      |
| <i>Phormidium minutum</i> D5          | Marine habitat                                      | 7                       | 17.1                  | 0.9         | 4.5      |          |         | Gloaguen et al. (1995)      |
| <i>Phormidium minutum</i> NB5         | Marine habitat                                      | 7                       | 24.4                  | tr          |          |          |         | Gloaguen et al. (1995)      |
| <i>Phormidium minutum</i> RT6         | Marine habitat                                      | 9                       | 20.1                  | 7.1         | 7.7      |          |         | Gloaguen et al. (1995)      |
| <i>Phormidium</i> sp.                 | Lake, Antarctica                                    | 9                       | 9                     | 24.5        |          |          | 13      | Matulewicz et al. (1984)    |
| <i>Phormidium</i> sp.                 | Unknown                                             | 6                       |                       | 5.8         |          |          |         | Nicolaus et al. (1999)      |
| <i>Phormidium</i> sp. 90-14/1         | Intertidal habitat, New Guinea                      | 8                       | 3.0                   | 5.8         | 3        |          |         | Gloaguen et al. (1995)      |
| <i>Phormidium</i> sp. CCAP1463/4      | Phosphorescent bay, Massachusetts                   | 9                       | 13.0                  | 6.7         | 3.5      |          |         | Gloaguen et al. (1995)      |
| <i>Phormidium</i> sp. CCAP1464/3      | Marine habitat                                      | 8                       | 26.1                  | tr          | 4.4      |          |         | Gloaguen et al. (1995)      |
| <i>Phormidium</i> sp. J-1             | Benthic, drainage canal, Israel                     |                         | 34.0                  |             | 1.65     |          | 4.4     | Bar-Or & Shilo (1987)       |
| <i>Phormidium</i> sp. PNG91           | Intertidal habitat, New Guinea                      | 9                       | tr                    | 5.6         | 3.6      |          |         | Gloaguen et al. (1995)      |
| <i>Phormidium tenue</i> *             | Desert algal crusts, China                          | 8                       | tr                    | 12.7        |          |          | 21.9    | Hu et al. (2003a)           |
| <i>Phormidium uncinatum</i>           | Unknown                                             | 5                       | 0                     | < 5         | 0        |          |         | Hoiczky (1998)              |
| <i>Plectonema battersii</i> *         | Brackish ponds, French Polynesia                    | 8                       | 7                     | 11.1        | 16       |          | 11      | Richert et al. (2005)       |
| <i>Plectonema golenkinianum</i> *     | Brackish ponds, French Polynesia                    | 8                       | 11                    | 20.4        | 0        |          | 19      | Richert et al. (2005)       |
| <i>Spirulina maxima</i>               | China                                               | 8                       | p                     | p           |          |          |         | Nie et al. (2002)           |
| <i>Spirulina platensis</i>            | China                                               | 5                       | 20.0                  | p           |          |          |         | Tseng & Zhao (1994)         |
| <i>Spirulina platensis</i> PCC 8005   | Unknown                                             | 10                      | 40                    | 13.6        | 5        |          |         | Filali Mouhim et al. (1993) |

The cyanobacteria are sourced from a culture collection unless specified otherwise.

\*Monocyanobacterial culture.

†Field sample.

p, present, but not quantified; tr, trace.

**Table 1c.** Main constituents of EPS produced by filamentous heterocystous cyanobacteria

| Filamentous heterocystous organisms         | Ecological origin              | No. of mono-saccharides | Wt/EPS dry weight (%) |              |          |          |         |          | References                        |
|---------------------------------------------|--------------------------------|-------------------------|-----------------------|--------------|----------|----------|---------|----------|-----------------------------------|
|                                             |                                |                         | Uronic acids          | Deoxy-sugars | Sulphate | Pyruvate | Acetate | Peptides |                                   |
| <i>Anabaena cylindrica</i>                  | Unknown                        | 5                       | 0                     | 0            |          |          |         |          | Dunn & Wolk (1970)                |
| <i>Anabaena cylindrica</i> 10 C             | Unknown                        | 7                       | 1.7                   | 10.1         | p*       |          |         |          | Lama <i>et al.</i> (1996)         |
| <i>Anabaena cylindrica</i> CCAP1403/2       | Freshwater pond, UK            | 6                       | 28                    | 6            |          |          |         |          | Bishop <i>et al.</i> (1954)       |
| <i>Anabaena flos-aquae</i>                  | Freshwater                     | 4                       | p                     | 0            |          |          |         |          | Moore & Tischer (1964)            |
| <i>Anabaena flos-aquae</i> A-37             | Unknown                        | 4                       | 58.4                  | 0            |          |          |         |          | Wang & Tischer (1973)             |
| <i>Anabaena flos-aquae</i> A-37             | Unknown                        | 4                       | 0.9                   | 0            |          |          |         |          | Moore & Tischer (1965)            |
| <i>Anabaena</i> sp.                         | Water reservoir, Taiwan        | 3                       | 0                     | p            |          |          |         |          | Huang <i>et al.</i> (2007)        |
| <i>Anabaena</i> sp. ATCC 33047              | Algal mat, Texas               | 5                       | 19.4                  | 0            | 0        |          |         | 7        | Moreno <i>et al.</i> (2000)       |
| <i>Anabaena</i> sp. C5*                     | Soil, Yugoslavia               | 5                       | p                     |              |          |          |         | 51.5     | Gantar <i>et al.</i> (1995)       |
| <i>Anabaena</i> sp. PC-1                    | Unknown                        |                         | 5                     |              | p        |          |         | 12       | Choi <i>et al.</i> (1998)         |
| <i>Anabaena sphaerica</i>                   | Unknown                        | 4                       | p                     | 0            |          |          |         |          | Nicolaus <i>et al.</i> (1999)     |
| <i>Anabaena spiroides</i> *                 | Water reservoir, Brazil        | 8                       | 9                     | 33.9         |          |          |         |          | Gouvea <i>et al.</i> (2005)       |
| <i>Anabaena torulosa</i>                    | Soil, France                   | 7                       | 0                     | 8.7          |          |          |         |          | Nicolaus <i>et al.</i> (1999)     |
| <i>Anabaenopsis circularis</i> PCC 6720     | Drainage canal, Israel         |                         | 0                     |              | 0        |          |         | 0        | Bar-Or & Shilo (1987)             |
| <i>Chlorogloeopsis</i> sp. PCC 6912         | Soil, India                    | 6                       | p                     | 10.2         |          |          |         |          | Nicolaus <i>et al.</i> (1999)     |
| <i>Cyanospira capsulata</i>                 | Alkaline lake, Kenya           | 7                       | 37.5                  | 12.5         |          | p        |         | p        | Garozzo <i>et al.</i> (1995)      |
| <i>Cyanospira capsulata</i> ATCC 43193      | Alkaline lake, Kenya           | 5                       | 36.5                  | 15.4         | 0        | 1.5      | 0       | 2.0      | Vincenzini <i>et al.</i> (1990)   |
| <i>Fischerella maior</i> Nav 10 bis         | Catacombs, Italy               | 7                       | 12.8                  | 21.4         | p        |          |         |          | Bellezza <i>et al.</i> (2006)     |
| <i>Fischerella muscicola</i>                | Unknown                        | 5                       |                       | 17.6         |          |          |         |          | Nicolaus <i>et al.</i> (1999)     |
| <i>Mastigocladus laminosus</i> <sup>†</sup> | Thermal spring, France         | 11                      | p                     | p            |          |          |         |          | Gloaguen <i>et al.</i> (1999)     |
| <i>Nostoc flagelliforme</i> <sup>†</sup>    | Desert China                   | 3                       | 0                     | 0            |          |          |         |          | Huang <i>et al.</i> (1998)        |
| <i>Nostoc calcicola</i> 79WA01              | Soils, Washington              | 9                       | 21.8                  | 15.5         |          |          |         | 30       | Flaibani <i>et al.</i> (1989)     |
| <i>Nostoc carneum</i>                       | Contaminated soil, India       | 2                       | 0                     | 0            | 0        |          |         | 27.2     | Parikh & Madamwar (2006)          |
| <i>Nostoc commune</i> <sup>†</sup>          | Mountain area, China           | 7                       | 13.3                  | 5.8          |          |          |         |          | Huang <i>et al.</i> (1998)        |
| <i>Nostoc commune</i>                       | Freshwater, China              | 6                       | 18.4                  | 0            |          |          |         |          | Brüll <i>et al.</i> (2000)        |
| <i>Nostoc commune</i> DRH-1                 | Desert, Mongolia               | 7                       | 22.7                  | 0            | 0        |          |         |          | Helm <i>et al.</i> (2000)         |
| <i>Nostoc commune</i> UTEX584               | Unknown                        | 9                       | 42                    | 9            |          |          |         |          | Flaibani <i>et al.</i> (1989)     |
| <i>Nostoc insulare</i> 54.79                | Soil                           | 4                       | 26.4                  | 0            | 0        | tr       | tr      | 0.7      | Volk <i>et al.</i> (2007)         |
| <i>Nostoc insulare</i> 54.79                | Soil                           | 8                       | 25.3                  | 8.9          |          |          |         | 3.5      | Fischer <i>et al.</i> (1997)      |
| <i>Nostoc linckia</i> f. <i>muscorum</i>    | Unknown                        | 6                       | p                     | p            |          |          |         |          | Mehta & Vaidya (1978)             |
| <i>Nostoc</i> sp.                           | Contaminated soil, India       | 2                       | 0                     | 0            | 0        |          |         | 40.1     | Parikh & Madamwar (2006)          |
| <i>Nostoc</i> sp.                           | Unknown                        | 4                       | p                     | p            |          |          |         |          | Moore & Tischer (1964)            |
| <i>Nostoc</i> sp.                           | Unknown                        | 6                       | p                     | p            |          |          |         |          | Mehta & Vaidya (1978)             |
| <i>Nostoc</i> sp.*                          | Desert algal crusts, China     | 6                       | 0                     | 3.5          |          |          |         | 7.5      | Hu <i>et al.</i> (2003a)          |
| <i>Nostoc</i> sp. 221                       | Unknown                        | 3                       | 41.3                  | 0            |          |          |         |          | Mehta & Vaidya (1978)             |
| <i>Nostoc</i> sp. 2S9B*                     | Soil, Yugoslavia               | 4                       | p                     |              |          |          |         | 2.8      | Gantar <i>et al.</i> (1995)       |
| <i>Nostoc</i> sp. D                         | Unknown                        | 6                       | 0                     | 0            |          |          |         |          | Cupac & Gantar (1992)             |
| <i>Nostoc</i> sp. PCC 6302                  | Unknown                        | 8                       | 69.4                  | 3.9          | 0        | 0        | 0.5     | 6.9      | De Philippis <i>et al.</i> (2000) |
| <i>Nostoc</i> sp. PCC 6310                  | Pond, Israel                   | 9                       | 4.3                   | 1.6          | p        | 1.4      | 3.3     | 69.5     | De Philippis <i>et al.</i> (2000) |
| <i>Nostoc</i> sp. PCC 6705                  | Botanical garden, California   | 9                       | 26.8                  | 2.1          | p        | 3.2      | 1.7     | 6.9      | De Philippis <i>et al.</i> (2000) |
| <i>Nostoc</i> sp. PCC 6719                  | Soil water culture, California | 9                       | 9.9                   | 0.7          | p        | 5.0      | 2.4     | 0.8      | De Philippis <i>et al.</i> (2000) |
| <i>Nostoc</i> sp. PCC 6720                  | Soil, Indonesia                | 8                       | 13.5                  | 4.1          | p        | 2.1      | 1.1     | 3.1      | De Philippis <i>et al.</i> (2000) |
| <i>Nostoc</i> sp. PCC 7107                  | Pond, California               | 9                       | 26.7                  | 6.7          | p        | 0.7      | 2.7     | 3.4      | De Philippis <i>et al.</i> (2000) |
| <i>Nostoc</i> sp. PCC 7119                  | Unknown                        | 6                       | 5.2                   | 0.5          | p        | 5.0      | 3.4     | 0.9      | De Philippis <i>et al.</i> (2000) |
| <i>Nostoc</i> sp. PCC 7413                  | Soil, UK                       | 9                       | 19.3                  | 2.0          | p        | 6.2      | 3.3     | 0.6      | De Philippis <i>et al.</i> (2000) |
| <i>Nostoc</i> sp. PCC 7416                  | Shallow pool, California       | 8                       | 23.6                  | 4.6          | p        | 0        | 4.0     | 9.7      | De Philippis <i>et al.</i> (2000) |
| <i>Nostoc</i> sp. PCC 7422                  | Cycas roots                    | 8                       | 26.8                  | 5.4          | p        | 2.4      | 2.0     | 4.7      | De Philippis <i>et al.</i> (2000) |
| <i>Nostoc</i> sp. PCC 7423                  | Dried soil, Senegal            | 7                       | 18.8                  | 0.8          | p        | 3.2      | 6.8     | 18.4     | De Philippis <i>et al.</i> (2000) |

Table 1c. Continued.

| Filamentous heterocystous organisms | Ecological origin                           | No. of monosaccharides | Wt/EPS dry weight (%) |              |          |          |         |          | References                       |
|-------------------------------------|---------------------------------------------|------------------------|-----------------------|--------------|----------|----------|---------|----------|----------------------------------|
|                                     |                                             |                        | Uronic acids          | Deoxy-sugars | Sulphate | Pyruvate | Acetate | Peptides |                                  |
| <i>Nostoc</i> sp. PCC 7706          | Water below calcareous stone, France        | 7                      | 25.2                  | 1.2          | 0        | 0        | 0.8     | 10.3     | De Philippis et al. (2000)       |
| <i>Nostoc</i> sp. PCC 7803          | Sand dunes, UK                              | 8                      | 22.0                  | 0.8          | 0        | 0.2      | 1.1     | 5.5      | De Philippis et al. (2000)       |
| <i>Nostoc</i> sp. PCC 7807          | Soil, France                                | 7                      | 28.7                  | 0.6          | p        | 6.1      | 2.0     | 10.2     | De Philippis et al. (2000)       |
| <i>Nostoc</i> sp. PCC 7906          | Freshwater,                                 | 8                      | 37.7                  | 3.3          | 0        | 0        | 1.9     | 15.6     | De Philippis et al. (2000)       |
| <i>Nostoc</i> sp. PCC 7933          | Mud, Finland                                | 8                      | 33.7                  | 4.8          | p        | 0        | 1.4     | 5.9      | De Philippis et al. (2000)       |
| <i>Nostoc</i> sp. PCC 7936          | Rice field, India                           | 5                      | 51.1                  | 0.6          | p        | 5.8      | 1.8     | 2.1      | De Philippis et al. (2000)       |
| <i>Nostoc</i> sp. PCC 7937          | Freshwater, Mississippi                     | 7                      | 4.9                   | 0.9          | p        | 3.5      | 3.0     | 3.2      | De Philippis et al. (2000)       |
| <i>Nostoc</i> sp. PCC 8009/1        | Coralloid roots of <i>Macrozamia lucida</i> | 8                      | 12.7                  | 1.2          | p        | 0.4      | 3.7     | 3.3      | De Philippis et al. (2000)       |
| <i>Nostoc</i> sp. PCC 8109          | Unknown                                     | 7                      | 62.4                  | 1.1          | 0        | 0.6      | 0.7     | 24.6     | De Philippis et al. (2000)       |
| <i>Nostoc</i> sp. PCC 8112          | Laundromat discharge pond, Michigan         | 9                      | 42.2                  | 5.0          | p        | 0.4      | 0.9     | 11.7     | De Philippis et al. (2000)       |
| <i>Nostoc</i> sp. PCC 8113          | Unknown                                     | 8                      | 6.6                   | 5.1          | p        | 5.8      | 0       | 3.8      | De Philippis et al. (2000)       |
| <i>Nostoc</i> sp. PCC 8306          | Soil, West Africa                           | 7                      | 56.7                  | 3.2          | 0        | 0.7      | 0       | 21.7     | De Philippis et al. (2000)       |
| <i>Nostoc</i> sp. PCC 9202          | Rice field, Spain                           | 9                      | 37.7                  | 2.0          | 0        | 0        | 0       | 5.0      | De Philippis et al. (2000)       |
| <i>Nostoc</i> sp. PCC 9305          | Anthoceros, California                      | 8                      | 13.2                  | 4.4          | 0        | 2.3      | 0       | 4.5      | De Philippis et al. (2000)       |
| <i>Nostoc</i> sp. WV2               | Unknown                                     | 6                      | p                     | p            |          |          |         |          | De Philippis & Vincenzini (1998) |
| <i>Scytonema hofmanni</i> PCC 7110  | Cave (limestone), Bermuda                   | 3                      |                       | 0            |          |          |         |          | Nicolaus et al. (1999)           |
| <i>Scytonema javanicum</i> *        | Desert algal crusts, China                  | 10                     | tr                    | 7.4          |          |          |         | 50.2     | Hu et al. (2003a)                |
| <i>Scytonema ocellatum</i> CP8-2    | Catacombs, Italy                            | 7                      | 16.6                  | 12.5         | p        |          |         |          | Bellezza et al. (2006)           |
| <i>Scytonema</i> sp.                | Thallus of <i>D. glabratum</i> , Brazil     | 10                     |                       | 11           |          |          |         |          | Sasaki et al. (2005)             |
| <i>Tolypothrix tenuis</i> PCC 7101  | Soil, Borneo                                | 6                      |                       | 14.3         |          |          |         |          | Nicolaus et al. (1999)           |

The cyanobacteria are sourced from a culture collection unless specified otherwise.

\*Monocyanobacterial culture.

†Field sample.

p, present, but not quantified; tr, trace.

been identified in cyanobacterial EPS (Table 1): the hexoses, glucose, galactose, mannose and fructose, the pentoses, ribose, xylose and arabinose, the deoxyhexoses, fucose, rhamnose and methyl rhamnose, and the acidic hexoses, glucuronic and galacturonic acid (De Philippis & Vincenzini, 1998, 2003; De Philippis et al., 2001). In a few cases, the presence of additional types of monosaccharides (i.e. methyl sugars and/or amino sugars) such as *N*-acetyl glucosamine, 2,3-*O*-methyl rhamnose, 3-*O*-methyl rhamnose, 4-*O*-methyl rhamnose and 3-*O*-methyl glucose have been reported (Hu et al., 2003a). The monosaccharide most frequently found at the highest concentration in cyanobacterial EPS is glucose, although there are polymers where other sugars, such as xylose, arabinose, galactose or fucose, are present at higher concentrations than glucose (Tease et al., 1991; Bender et al., 1994; Gloaguen et al., 1995; Fischer et al., 1997; De Philippis & Vincenzini, 1998, 2003; Parikh & Madamwar, 2006).

The high number of different monosaccharides found in cyanobacterial EPS and the consequential variety of linkage types is usually considered a reason for the presence of

complex repeating units, as well as for a broad range of possible structures and architectures of these macromolecules. As one consequence of this complexity, the cyanobacterial EPS are less well characterized than those of other microorganisms and only a few structures have been proposed (Table 2). The polysaccharides produced by *Nostoc commune* DRH-1, *Nostoc insulare* and *Cyanotheca* sp. ATCC 51142 are composed of repeating units of six, four and three monosaccharides, respectively (Helm et al., 2000; Huang et al., 2000; Shah et al., 2000; Volk et al., 2007). On the other hand, the structures proposed for the EPS produced by *Mastigocladus laminosus* and *Cyanospira capsulata* are far more complex, with repeating units of 15 and eight monosaccharides, respectively (Garozzo et al., 1995, 1998; Gloaguen et al., 1995, 1999). For *Spirulina platensis*, no structure was proposed, but it was demonstrated that its EPS repeating unit contains at least 15 sugar residues (Filali Mouhim et al., 1993).

The knowledge of the structure of a polysaccharide is generally considered necessary to infer its physicochemical properties (De Philippis & Vincenzini, 1998). Indeed, the

**Table 2.** Overview of the published structures of the heteropolysaccharides produced by cyanobacteria

| Organisms (ecological origin)                                               | Repeating units                                                                                                                                                                                                                                                                                                                                                                                                                                                                                                                                                                                                                                                                                                                                                                                                                                                                                                   | References                     |
|-----------------------------------------------------------------------------|-------------------------------------------------------------------------------------------------------------------------------------------------------------------------------------------------------------------------------------------------------------------------------------------------------------------------------------------------------------------------------------------------------------------------------------------------------------------------------------------------------------------------------------------------------------------------------------------------------------------------------------------------------------------------------------------------------------------------------------------------------------------------------------------------------------------------------------------------------------------------------------------------------------------|--------------------------------|
| Unicellular<br><i>Cyanothece</i> sp. ATCC 51142<br>(intertidal area, Texas) | $\left[ \begin{array}{c} \text{4) } \alpha\text{-D-Idop-2-C-carboxylic acid(1} \rightarrow \text{4) 2-Deoxy-2-C-methyl-}\alpha\text{-D-Glcp(1} \\ \text{3} \end{array} \right]_n$ <p style="text-align: center;">↓</p> $\text{6}$ <p style="text-align: center;">3-Deoxy-<math>\alpha</math>-D-Idop-3-C-sulfonic acid</p>                                                                                                                                                                                                                                                                                                                                                                                                                                                                                                                                                                                         | Shah et al.<br>(2000)          |
| Filamentous heterocystous<br><i>Cyanospira capsulata</i> (unknown)          | $\left[ \begin{array}{c} \text{3) } \alpha\text{-D-GlcpNAc(1} \rightarrow \text{3) } \alpha\text{-D-GalpA(1} \rightarrow \text{3) } \alpha\text{-L-Fucp(1} \\ \text{4} \end{array} \right]_n$ <p style="text-align: center;">↓</p> $\text{1}$ <p style="text-align: center;"><math>\alpha</math>-L-Arap</p> <p style="text-align: center;">↓</p> $\text{1}$ <p style="text-align: center;"><math>\alpha</math>-D-GalpA</p> <p style="text-align: center;">↓</p> $\text{3}$ <p style="text-align: center;"><math>\beta</math>-D-Glcp</p> <p style="text-align: center;">↓</p> $\text{1}$ <p style="text-align: center;"><math>\beta</math>-D-manp</p> <p style="text-align: center;">↓</p> $\text{1}$ <p style="text-align: center;"><math>\beta</math>-D-d-manp</p> <p style="text-align: center;">↓</p> $\text{1}$ <p style="text-align: center;">(S)-CH<sub>3</sub>-CH-β-D-d-manp<br/> <br/>CO<sub>2</sub>H</p> | Garozzo et al.<br>(1995, 1998) |

Table 2. Continued.

| Organisms (ecological origin)                               | Repeating units                                                                                                                                                                                                                                                                                                                                                                                                                                                                                                                                                                                                                                                                                  | References                              |
|-------------------------------------------------------------|--------------------------------------------------------------------------------------------------------------------------------------------------------------------------------------------------------------------------------------------------------------------------------------------------------------------------------------------------------------------------------------------------------------------------------------------------------------------------------------------------------------------------------------------------------------------------------------------------------------------------------------------------------------------------------------------------|-----------------------------------------|
| <i>Mastigocladus laminosus*</i><br>(thermal spring, France) | $\begin{array}{c} \alpha\text{-D-GlcpA} \\ 1 \downarrow \\ \beta\text{-D-Glcp} (1 \rightarrow 3) \alpha\text{-L-Fucp} (1 \rightarrow 6) \beta\text{-D-Galp} \\ 3 \\ 1 \downarrow \\ 4 \\ \left[ 4) \alpha\text{-D-GlcpA} (1 \rightarrow 2) \alpha\text{-D-GalpA} (1 \rightarrow 2) \beta\text{-D-manp} (1 \rightarrow 4) \beta\text{-D-Galp} (1 \rightarrow 2) \alpha\text{-L-Rhap} (1 \rightarrow 3) \right]_n \\ 3 \downarrow \\ 1 \\ \beta\text{-D-Glcp} \\ 4 \\ 1 \downarrow \\ 1 \\ \beta\text{-D-Xylp} (1 \rightarrow 4) \alpha\text{-L-Fucp} (1 \rightarrow 3) \beta\text{-D-Glcp} \\ 3 \downarrow \\ 1 \\ \alpha\text{-D-GlcpA} \\ 1 \downarrow \\ 1 \\ \beta\text{-D-Xylp} \end{array}$ | Gloaguen et al. (1995)                  |
| <i>Nostoc commune</i> DRH-1<br>(desert, Mongolia)           | $\begin{array}{c} \beta\text{-NosA} \\ 1 \downarrow \\ 6 \\ \left[ 4) \beta\text{-D-Glcp} (1 \rightarrow 4) \alpha\text{-D-Galp} (1 \rightarrow 4) \beta\text{-D-Glcp} (1 \rightarrow 4) \beta\text{-D-Xylp} (1 \rightarrow 3) \right]_n \\ 3 \downarrow \\ 1 \\ \alpha\text{-L-Ribf} \end{array}$                                                                                                                                                                                                                                                                                                                                                                                               | Helm et al. (2000), Huang et al. (2000) |
| <i>Nostoc insulare</i> 54.79 (soil)                         | $\begin{array}{c} \left[ 1) \text{Glcp} (3 \rightarrow 1) \text{Glcp} (4 \rightarrow 1) \text{GlcpA} (4 \rightarrow 1) \right]_n \\ 3 \downarrow \\ 1 \\ 3\text{-O-methyl-Araf} \end{array}$                                                                                                                                                                                                                                                                                                                                                                                                                                                                                                     | Volk et al. (2007)                      |

The cyanobacteria are sourced from a culture collection unless specified otherwise.

GlcA, glucuronic acid; GalA, galacturonic acid; NosA, nosturonic acid; ido, idose; Glc, glucose; Gal, galactose; Fuc, fucose; Ara, arabinose; Man, mannose; Rha, rhamnose; Xyl, xylose; Rib, ribose. p, pyranose form; f, furanose form;  $\alpha$ , anomer  $\alpha$ ;  $\beta$ , anomer  $\beta$ .

\*Field sample.



**Table 3.** Molecular masses of the EPS released by cyanobacteria

| Organism                               | Ecological origin                        | Apparent molecular mass (kDa) | References                                                      |
|----------------------------------------|------------------------------------------|-------------------------------|-----------------------------------------------------------------|
| Unicellular                            |                                          |                               |                                                                 |
| <i>Chroococcus minutus</i> B 41.79     | Water reservoir, India                   | 1200–1600                     | Fischer <i>et al.</i> (1997)                                    |
| Filamentous                            |                                          |                               |                                                                 |
| <i>Microcoleus vaginatus</i> *         | Desert algal crusts, China               | 380                           | Hu <i>et al.</i> (2003a)                                        |
| <i>Oscillatoria</i> sp.†               | Microbial mats, Florida                  | ≥ 200                         | Bender <i>et al.</i> (1994)                                     |
| <i>Phormidium</i> 94a*                 | Arid soil, Mexico                        | 2000                          | Vicente-García <i>et al.</i> (2004)                             |
| <i>Phormidium</i> J-1                  | Drainage canal, Israel                   | 1200                          | Bar-Or & Shilo (1987)                                           |
| <i>Phormidium tenue</i> *              | Desert algal crusts, China               | 380                           | Hu <i>et al.</i> (2003a)                                        |
| <i>Spirulina platensis</i>             | China                                    | 81–98                         | Tseng & Zhao (1994)                                             |
| Filamentous heterocystous              |                                          |                               |                                                                 |
| <i>Anabaena circularis</i> PCC 6720    | Drainage canal, Israel                   | >1200                         | Bar-Or & Shilo (1987)                                           |
| <i>Anabaena spiroides</i> *            | Water reservoir, Brazil                  | 2000                          | Colombo <i>et al.</i> (2004)                                    |
| <i>Anabaena</i> sp. ATCC 33047         | Algal mat, Texas                         | 1350                          | Moreno <i>et al.</i> (2000)                                     |
| <i>Cyanospira capsulata</i> ATCC 43193 | Alkaline lake, Kenya                     | 1400–1900                     | Vincenzini <i>et al.</i> (1993),<br>Cesàro <i>et al.</i> (1990) |
| <i>Nostoc insulare</i> 54.79           | Soil                                     | 540–1300                      | Fischer <i>et al.</i> (1997)                                    |
| <i>Nostoc</i> sp.*                     | Desert algal crusts, China               | 460                           | Hu <i>et al.</i> (2003a)                                        |
| <i>Schizothrix</i> sp.*                | Intertidal marine stromatolites, Bahamas | 300                           | Kawaguchi & Decho (2002)                                        |
| <i>Scytonema javanicum</i> *           | Desert algal crusts, China               | 110–380                       | Hu <i>et al.</i> (2003a)                                        |

The cyanobacteria are sourced from a culture collection unless specified otherwise.

\*Monocyanobacterial culture.

†Field sample.

interest in cyanobacteria as producers of high-molecular-weight polysaccharides is related to the capability of these biopolymers to modify the rheological properties of water, acting as thickening agents (Sutherland, 1996), and to stabilize the flow properties of aqueous solutions. Thus, one of the key features of a polysaccharide, which determines most of the properties generally considered to be useful for industrial applications, is its high molecular mass (Shepherd *et al.*, 1995), as this characteristic has a direct influence on the rheological properties of solutions of the polymer (Kamal *et al.*, 2003). The molecular masses reported thus far for the exopolysaccharides released by cyanobacteria are listed in Table 3; the highest molecular masses were found for the polysaccharides produced by *C. capsulata*, *Anabaena spiroides* and *Phormidium* 94, which are about 2 MDa. These values, significantly higher than that of xanthan gum, which has a molecular mass of about 1 MDa (Kamal *et al.*, 2003), point to the potential of these polymers for biotechnological exploitation as viscosifying or suspending agents. In this context, it is worth mentioning that the viscosity of some of the cyanobacterial exopolysaccharides is comparable to, or even higher than, that of aqueous solutions of xanthan gum at similar concentrations (Sutherland, 1996; De Philippis *et al.*, 2000). However, even if only a very limited number of cyanobacterial EPS have been fully described regarding their flow properties (Cesàro *et al.*, 1990; Navarini *et al.*, 1990; Lapasin *et al.*, 1992; Moreno *et al.*, 2000; Morris *et al.*, 2001), there are a few reports emphasizing the dependence of viscosity on the shear rate of water solutions of cyanobacterial EPS and of commer-

cial xanthan gum. Comparing the viscosity data (Table 4), it is possible to conclude that some of the RPS produced by cyanobacteria (e.g. the RPS synthesized by *Cyanothece* strains CE4 and CA3) possess very high viscosities, up to four times higher than that of xanthan gum. However, it should be stressed that, to make a reliable comparison of the flow properties of two polysaccharides, it is necessary to evaluate additional rheological properties, as well as to assess the dependence of these properties on factors such as pH, temperature and the ionic strength of the solution.

It has been reported that cyanobacterial EPS are not only composed of carbohydrates but also of other macromolecules such as polypeptides (Kawaguchi & Decho, 2000). Polypeptides enriched with glycine, alanine, valine, leucine, isoleucine and phenylalanine have been reported in the EPS of *C. capsulata* and *Nucula calcicola* (Flaibani *et al.*, 1989; Marra *et al.*, 1990), and in *Schizothrix* sp., small proteins specifically enriched with aspartic and glutamic acid have been observed (Kawaguchi & Decho, 2002). In general, the chemical composition, the type and the amount of the exopolysaccharides produced by a given cyanobacterial strain are stable features, mostly depending on the species and the cultivation conditions (Nicolaus *et al.*, 1999). However, the sugar composition of the EPS produced by a certain strain may, qualitatively and quantitatively, vary slightly, especially with the age of the culture (Gloaguen *et al.*, 1995; De Philippis & Vincenzini, 1998).

According to the chemical and physicochemical features of the cyanobacterial exopolysaccharides summarized

**Table 4.** Viscosity (expressed as mPa s and measured at  $10.1\text{ s}^{-1}$  shear rate) of 0.1% (w/v) water solutions of pure cyanobacterial polysaccharides (RPS) or of xanthan gum (Kelco Keltrol, commercial grade)

| Organism                           | Viscosity (mPa s) | References                        |
|------------------------------------|-------------------|-----------------------------------|
| <i>Anabaena</i> ATCC 33047         | 100.0*            | Moreno <i>et al.</i> (2000)       |
| <i>Aphanothece halophytia</i> GR02 | 9.5 <sup>†</sup>  | Morris <i>et al.</i> (2001)       |
| <i>Cyanospira capsulata</i>        | 158.5             | De Philippis & Vincenzini (1998)  |
| <i>Cyanothece</i> CA3              | 398.1             | De Philippis & Vincenzini (1998)  |
| <i>Cyanothece</i> CE4              | 400.0             | De Philippis <i>et al.</i> (2001) |
| <i>Cyanothece</i> ET2              | 5.6               | De Philippis & Vincenzini (1998)  |
| <i>Cyanothece</i> IR20             | 80.0              | De Philippis & Vincenzini (1998)  |
| <i>Cyanothece</i> PE14             | 158.5             | De Philippis & Vincenzini (1998)  |
| <i>Nostoc cameum</i>               | 6.9 <sup>‡</sup>  | Parikh & Madamwar (2006)          |
| <i>Nostoc</i> PCC 6705             | 40.0              | De Philippis <i>et al.</i> (2001) |
| <i>Nostoc</i> PCC 6705             | 19.5              | De Philippis <i>et al.</i> (2000) |
| <i>Nostoc</i> PCC 7119             | 125.9             | De Philippis <i>et al.</i> (2000) |
| <i>Nostoc</i> PCC 7422             | 7.9               | De Philippis <i>et al.</i> (2000) |
| <i>Nostoc</i> PCC 7423             | 158.5             | De Philippis <i>et al.</i> (2000) |
| <i>Nostoc</i> PCC 7937             | 12.3              | De Philippis <i>et al.</i> (2000) |
| <i>Nostoc</i> sp.                  | 11.7 <sup>‡</sup> | Parikh & Madamwar (2006)          |
| <i>Oscillatoria</i> sp.            | 12.1 <sup>‡</sup> | De Philippis <i>et al.</i> (2000) |
| Xanthan gum                        | 78.9              | De Philippis & Vincenzini (1998)  |

\*Exopolysaccharides in a 0.4% (w/w) solution.

<sup>†</sup>Exopolysaccharides in a 0.6% (w/v) solution.

<sup>‡</sup>Intrinsic viscosity ( $\mu$ ) in deionized water.

above, there are at least three possible fields of application for these polymers: (1) in the food, cosmetic, textile or painting industries, for the modification of the flow properties of water, i.e. as thickening, suspending or emulsifying agents (De Philippis & Vincenzini, 1998, 2003; Li *et al.*, 2002; Parikh & Madamwar, 2006); (2) in the pharmaceutical industry, because of their antiviral or immuno-stimulating properties or the capability of slowly releasing drugs (Schaeffer & Krylov, 2000; Jensen *et al.*, 2001; Pugh *et al.*, 2001; Ghosh *et al.*, 2009); (3) in waste water treatment plants or the goldsmith industry, for the chelation of toxic or valuable metal ions from water solutions, i.e. as biosorbents (De Philippis & Micheletti, 2009).

Considering the extensive literature claiming the potential for industrial exploitation of these biopolymers, one would expect that at least for some of them the technology transfer had already occurred. However, in spite of a significant number of patents available, covering the use of cyanobacterial polysaccharides in various industrial fields (see, for instance, the review published in 2006 by Sekar & Paulraj) on the patents filed at the US Patent and Trademark

Office), no industrial product derived from these biopolymers is available in the market. In our opinion, the main reason for this discrepancy is the presence in the market of well-established industrial processes for heterotrophic microorganisms that in the short term would be expensive to convert for cyanobacteria. In the case of thickening agents in foods, it has to be stressed that there are already other microbial polysaccharides in the market, the most important being xanthan gum, gellan and pullulan, respectively, produced by *Xanthomonas campestris*, *Pseudomonas elodea* and *Aureobasidium pullulans*, and dextran, produced by several lactic acid bacteria belonging to the genera *Leuconostoc*, *Lactobacillus* and *Streptococcus*. These biopolymers have already undergone the complex, expensive and time-consuming procedures for their approval as food additives. Thus, even if some of the cyanobacterial exopolysaccharides, such as the one produced by *C. capsulata* (Navarini *et al.*, 1990), show better rheological properties, the differences would not be significant enough to risk a new technology transfer in competition with well-established commercial products. Similarly, the exploitation of cyanobacteria producing polysaccharides with good antiviral activity has not been considered worth developing new drugs. This is due to the long and very expensive procedures needed for the commercialization of new pharmaceutical products.

The possible use of exopolysaccharide-producing cyanobacteria for the recovery of valuable metals from industrial wash waters seems to be more promising than most of the above-mentioned applications. Indeed, the high economical value of the metal, which can be easily recovered from the biosorbent, might justify the investment necessary for the production of the biomass. However, this field of application is still in its infancy and needs more research to establish a simple and cheap technology for the production and utilization of the cyanobacterial biomass as biosorbent, as well as for the recovery of the metal.

### Putative roles of EPS in cyanobacteria

The capability of cyanobacteria to survive in severe habitats (e.g. at the surface of a sand dune in a desert or exposed to high UV radiation on the lithic surfaces of monuments) has been related to the protective mechanisms that they have developed. Among these mechanisms, one of the most diffused within the cyanobacteria is the ability to synthesize external polysaccharidic layers that protect the cells from unfavourable environmental conditions. Many studies, in fact, have shown that a coating of extracellular polysaccharidic material can protect bacteria against dehydration, phagocytosis, antibody recognition and even lysis by viruses (Dudman, 1977; Tease & Walker, 1987; Hill *et al.*, 1994; Scott *et al.*, 1996; Hoiczky, 1998; De Vuyst & Degeest, 1999; Sutherland, 1999; Ruas-Madiedo *et al.*, 2002; De Philippis

& Vincenzini, 2003; Tsuneda *et al.*, 2003; Welman & Maddox, 2003), or confer to the cells the ability to adhere to a solid substrate, preventing them from being washed away from their natural habitat by water flow (Dudman, 1977; Scott *et al.*, 1996; De Philippis *et al.*, 2005).

A number of cyanobacteria are capable of surviving nearly without water, producing both internal and external polysaccharides, which help to stabilize the macromolecular constituents of the cell, as well as the cell structure. It has been suggested that these polysaccharides can form hydrogen bonds with proteins, lipids and DNA, thus replacing the water shell that usually surrounds these macromolecules (Potts, 1994). EPS, owing to their hydrophilic/hydrophobic characteristics (see previous section), are able to trap and accumulate water, creating a gelatinous layer around the cells that regulates water uptake and loss, and stabilizes the cell membrane during periods of desiccation (Grilli Caiola *et al.*, 1993, 1996; Tamaru *et al.*, 2005). Upon rehydration, cyanobacteria can rapidly recover metabolic activities and repair cellular components (Scherer *et al.*, 1984, 1986; Satoh *et al.*, 2002; Fleming & Castenholz, 2007). A good example of this is the filamentous EPS-producing cyanobacterium *N. commune*, which is ubiquitously distributed from the tropics to the polar regions of the Earth. These cyanobacteria form macroscopic colonies in which the entangled filaments are embedded in massive polysaccharidic structures. In their natural environment, these colonies are subjected to frequent desiccation and rewetting cycles, during which they release large quantities of protective proteins and compounds such as mycosporine-like amino acids, UV-screen pigments and active Fe-containing superoxide dismutase (Hill *et al.*, 1994; Böhm *et al.*, 1995; Shirkey *et al.*, 2000).

Another important consequence of the above-described hydrophobicity of the cyanobacterial EPS becomes evident in desert microbial crusts, where the polysaccharides contribute to the hydrological properties of the soil by clogging sand particles and by causing the run-off of water on the dune, protecting the microbial community of the crusts from being washed away by the water flow (Mazor *et al.*, 1996; Kidron *et al.*, 1999).

Recently, it was demonstrated that the cyanobacterial sheath can protect the cells from the detrimental process of biomineralization (Phoenix *et al.*, 2000; Benning & Moun-tain, 2004). In fact, permeability studies demonstrated that the sheath of *Calothrix* sp. was impermeable to particles of at least 11 nm diameter, thus preventing the colloids from biomineralizing the sensitive components of the cell wall (Phoenix *et al.*, 2000; Benning *et al.*, 2004).

Furthermore, the presence of negatively charged polysaccharidic layers surrounding cyanobacterial cells may play an important role in the sequestration of metal cations, and in creating a microenvironment enriched in those metals that are essential for cell growth but are present at very low

concentrations in some environments (Parker *et al.*, 1996; Sutherland, 1999). On the other hand, the presence of a polysaccharidic layer surrounding the cells can also prevent direct contact between the cells and toxic heavy metals that may be present in the environment. Actually, it was recently suggested that the high viscosity of the cultures of *C. capsulata*, due to the solubilization in the culture medium of large amounts of a high molecular mass RPS, hindered the free diffusion of copper ions into the culture (De Philippis *et al.*, 2007).

The UV-absorbing pigment scytonemin was found in the sheath of a number of cyanobacteria living in environments characterized by a high level of solar irradiation (Garcia-Pichel & Castenholz, 1991; Ehling-Schulz *et al.*, 1997; Ehling-Schulz & Scherer, 1999). Moreover, in the sheath of some cyanobacterial strains, mycosporine-like amino acid compounds (MMAs) were also found (Adhikary & Sahu, 1998), confirming the role of the sheath in harbouring UV-absorbing substances, and thus protecting the cyanobacterial cells from the deleterious effects of UV radiation.

EPS may also play an important role in the locomotion of gliding cyanobacteria. Indeed, the secretion of slime can provide the necessary propulsive force for movement (Li *et al.*, 2002). Cyanobacterial exopolysaccharides may also protect nitrogenase (the complex responsible for nitrogen fixation) from the deleterious effects of oxygen (Kallas *et al.*, 1983).

Only a few of the ecological roles attributed to the cyanobacterial exopolysaccharides are fully supported by experimental data or detailed ecological observations. For instance, their role in protecting the cells against desiccation was experimentally demonstrated by a number of authors, in particular by Malcom Potts' group (Potts, 1994, 1999, 2004; Shaw *et al.*, 2003; Wright *et al.*, 2005) and Tamaru *et al.* (2005). These publications described in detail some of the chemical and molecular mechanisms by which the exocellular polysaccharidic layers prevent possible cell damage caused by desiccation and rewetting processes. Moreover, there is evidence that most of the cyanobacteria isolated from very dry environments (desert soils, lithic surfaces of monuments located in arid environments, etc.) are characterized by the capacity to synthesize large amounts of exocellular polysaccharidic material (Danin *et al.*, 1998; Brüll *et al.*, 2000; Belnap & Lange, 2001; Hu *et al.*, 2003b; Crispim & Gaylarde, 2005; Rivera-Aguilar *et al.*, 2006; Zhang *et al.*, 2006), thus supporting the role of these macromolecules in the survival of cyanobacteria in arid habitats. Another possible role that has been thoroughly investigated is the capacity of the sheath, capsules and slime to protect the cyanobacterial cells from the harmful effects of UV radiations. It was demonstrated that UV irradiation induces the synthesis of the extracellular polysaccharidic matrix in *N. commune* (Ehling-Schulz *et al.*, 1997; Wright *et al.*, 2005) and also that the UV-screen pigments are

accumulated in the sheath and in the extracellular matrix, constituting a barrier against the penetration of the harmful UV radiations (Böhm *et al.*, 1995; Ehling-Schulz & Scherer, 1999; Dillon *et al.*, 2002; Fleming & Castenholz, 2007, 2008).

On the other hand, the observed capacity of the cyanobacterial exopolysaccharides to chelate metal ions has been reported to enable cells to accumulate the metals necessary for their growth and/or to prevent cells from direct contact with metals with toxic effects. Indeed, this assumption arises from experiments demonstrating that most cyanobacterial EPS are anionic in nature due to the presence of charged constituents, such as uronic acids, sulphate and ketal-linked pyruvate groups (Table 1). Additionally, many studies demonstrated the affinity of exopolysaccharides for metals (Micheletti *et al.*, 2008a; De Philippis & Micheletti, 2009). However, direct experimental evidence demonstrating the ecological role of this metal-uptake capacity is not yet available.

The role of the cyanobacterial polysaccharidic investments seems to differ from strain to strain, and to be dependent on the physical and chemical characteristics of the natural habitat or culture medium in which the organism grows. A more accurate perception of the ecological roles of these polymers will be possible when the information on the genetic machinery related to their production is available. This will enable the conditions under which the genes are transcribed/expressed to be investigated.

### Factors affecting biosynthesis of cyanobacterial EPS

The use of cyanobacterial EPS for biotechnological applications depends on the identification of culture parameters that influence the synthesis and/or the characteristics of the EPS, and, subsequently, the establishment and control of the conditions that optimize the productivity and the suitable characteristics of the polymer. During the last three decades, several main factors controlling the production of the cyanobacterial EPS have been identified. These include energy availability and the C:N ratio (De Philippis & Vincenzini, 1998; Li *et al.*, 2002). However, other important factors such as the amounts of other nutrients as well as growth parameters such as light intensity, salinity and temperature have been largely disregarded, and very few exhaustive studies on factors influencing the production of cyanobacterial EPS are available in the literature. Moreover, the responses of cyanobacteria to changes in culture conditions appear to be frequently strain-dependent, making the optimization of EPS production even more difficult. The known key factors affecting EPS production are summarized in Table 5.

#### Nitrogen

Nitrogen is one of the most important elements for the synthesis of cell material, and cyanobacteria are either

dependent on a combined nitrogen source or, in a restricted number of strains, can fix atmospheric nitrogen. Correlation between the source/amount of nitrogen and the production of EPS has been evaluated for several cyanobacteria and different results were observed depending on the strain tested. Usually, as can be observed in Table 5, the presence of a combined nitrogen source in the culture medium resulted in an increase in EPS synthesis, probably due to the lower energy requirement necessary for the assimilation of combined nitrogen compared with the energy needed for nitrogen fixation (Otero & Vincenzini, 2003; Kumar *et al.*, 2007). In some cyanobacteria, the amount of polymer produced varied according to the nitrogen source used (De Philippis & Vincenzini, 1998), whereas *Anabaena flos-aquae* A37 showed similar EPS production when supplied with different nitrogen sources such as  $Mg(NO_3)_2$ ,  $KNO_3$ ,  $NaNO_3$ ,  $NH_4NO_3$  and  $NH_4Cl$  (Tischer & Davis, 1971). Moreover, it was also demonstrated that the composition of the polymer released by *Anabaena cylindrica* 10C was slightly modified when the strain was cultivated with different nitrogen sources (De Philippis & Vincenzini, 1998). Nitrogen starvation has often been described as a condition that enhances EPS synthesis (De Philippis *et al.*, 1993; Otero & Vincenzini, 2003), probably because this contributes to the increase in the C:N ratio, thus promoting the incorporation of carbon into polymers (Otero & Vincenzini, 2003; Kumar *et al.*, 2007). Nevertheless, it is difficult to detect a direct correlation between diazotrophic and nitrogen-limiting conditions because other factors, such as differences in the carbon fixation efficiency and in the control of the equilibrium between internal and extracellular carbon pools, may explain the variations observed in the production of EPS under different culture conditions (De Philippis & Vincenzini, 1998; Otero & Vincenzini, 2003). Indeed, it was observed that in the nitrogen-fixing cyanobacterium *C. capsulata*, the mere diversion of carbon flux from protein synthesis, caused by the addition of various inhibitors of nitrogen assimilation, induced the accumulation of intracellular carbohydrate reserves (i.e. glycogen), whereas an effective enhancement of the amount of carbon available to the cells, induced by the addition of glyoxylate, which is known to stimulate the  $CO_2$  fixation rate, caused an increase in the amount of EPS synthesized and released by the cells (De Philippis *et al.*, 1996).

#### Phosphate

The importance of phosphate supply in regulating the growth of cyanobacteria is widely recognized, especially in aquatic environments. Increased phosphate levels together with favourable weather conditions, for example water surface temperatures over 20 °C, often result in the development of widespread cyanobacterial blooms. The relationship

**Table 5.** Effects of culture conditions on the EPS production in cyanobacteria

| Organisms                                            | Effects                       |                      |                                |                     |                         |                  |                             | References                                                          |
|------------------------------------------------------|-------------------------------|----------------------|--------------------------------|---------------------|-------------------------|------------------|-----------------------------|---------------------------------------------------------------------|
|                                                      | Presence of combined nitrogen | Phosphate starvation | Increase in NaCl concentration | Continuous air flow | Increase in temperature | Continuous light | Increase in light intensity |                                                                     |
| Unicellular                                          |                               |                      |                                |                     |                         |                  |                             |                                                                     |
| <i>Aphanocapsa halophyta</i> MN11                    | +                             | –                    | +                              |                     |                         |                  | +                           | Sudo <i>et al.</i> (1995), Matsunaga <i>et al.</i> (1996)           |
| <i>Cyanothece</i> sp. 113                            | +                             |                      | +                              | +                   |                         |                  | +                           | Su <i>et al.</i> (2007)                                             |
| <i>Cyanothece</i> sp. 16Som2                         | –                             | +                    | =                              |                     |                         |                  |                             | De Philippis <i>et al.</i> (1993), De Philippis & Vincenzini (1998) |
| <i>Cyanothece</i> sp. ATCC 51142                     | +                             |                      | +                              |                     |                         |                  |                             | Nicolaus <i>et al.</i> (1999), Shah <i>et al.</i> (1999)            |
| <i>Gloeocapsa gelatinosa</i>                         | +                             |                      |                                |                     |                         | +                | +                           | Raungsomboon <i>et al.</i> (2006)                                   |
| <i>Gloeotheca</i> sp. ATCC 27152                     | +                             |                      |                                |                     |                         |                  |                             | Tease & Walker (1987)                                               |
| <i>Synechococcus elongatus</i> f. <i>A. nidulans</i> | +                             |                      |                                |                     |                         |                  |                             | Sangar & Dugan (1972)                                               |
| <i>Synechococcus</i> sp. BG0011                      | +                             | +                    | =                              |                     |                         |                  | +                           | Roux (1996), De Philippis & Vincenzini (1998)                       |
| Filamentous                                          |                               |                      |                                |                     |                         |                  |                             |                                                                     |
| <i>Microcoleus vaginatus</i>                         | +                             |                      | +                              |                     |                         |                  |                             | Hu <i>et al.</i> (2003a), Chen <i>et al.</i> (2006)                 |
| <i>Phormidium laminosum</i> (OH-1-pCl <sub>1</sub> ) | –                             |                      |                                |                     |                         |                  |                             | Fresnedo & Serra (1992)                                             |
| <i>Phormidium</i> sp.                                | +                             | –                    |                                | +                   |                         |                  | +                           | Nicolaus <i>et al.</i> (1999)                                       |
| <i>Phormidium tenue</i>                              | +                             |                      |                                |                     |                         |                  |                             | Hu <i>et al.</i> (2003a)                                            |
| <i>Spirulina</i> sp.                                 | –                             | +                    | +                              |                     | –                       |                  |                             | Nicolaus <i>et al.</i> (1999)                                       |
| Filamentous heterocystous                            |                               |                      |                                |                     |                         |                  |                             |                                                                     |
| <i>Anabaena cylindrica</i> 10 C                      | +                             | –                    |                                |                     |                         |                  |                             | Lama <i>et al.</i> (1996)                                           |
| <i>Anabaena flos-aquae</i> A37                       | =                             |                      |                                |                     |                         |                  |                             | Tischer & Davis (1971)                                              |
| <i>Anabaena</i> sp. ATCC 33047                       | –                             |                      | –                              | +                   | +                       |                  | +                           | Moreno <i>et al.</i> (1998)                                         |
| <i>Anabaena</i> sp. PC-1                             | +                             |                      | +                              |                     |                         |                  |                             | Choi <i>et al.</i> (1998)                                           |
| <i>Anabaena</i> sp. WSAF                             | +                             | –                    |                                | +                   |                         |                  | +                           | Nicolaus <i>et al.</i> (1999)                                       |
| <i>Anabaena</i> sp.                                  | +                             | +                    |                                |                     |                         |                  |                             | Huang <i>et al.</i> (2007)                                          |
| <i>Anabaena torulosa</i>                             | +                             | –                    |                                | +                   |                         |                  | +                           | Nicolaus <i>et al.</i> (1999)                                       |
| <i>Cyanospira capsulata</i>                          |                               | =                    | =                              |                     |                         |                  | +                           | De Philippis <i>et al.</i> (1991)                                   |
| <i>Nostoc commune</i>                                | +                             |                      |                                |                     |                         |                  |                             | Huang <i>et al.</i> (1998)                                          |
| <i>Nostoc</i> sp.                                    | –                             |                      |                                |                     |                         |                  |                             | Hu <i>et al.</i> (2003a)                                            |
| <i>Nostoc</i> sp. PCC 7413                           | +                             |                      |                                |                     |                         |                  | +                           | Otero & Vincenzini (2003)                                           |
| <i>Nostoc</i> sp. PCC 7936                           | –                             |                      |                                |                     | =                       |                  | +                           | Otero & Vincenzini (2003, 2004)                                     |
| <i>Nostoc</i> sp. PCC 8113                           | –                             |                      |                                |                     |                         |                  | +                           | Otero & Vincenzini (2003, 2004)                                     |
| <i>Scytonema javanicum</i>                           | –                             |                      |                                |                     |                         |                  |                             | Hu <i>et al.</i> (2003a)                                            |
| <i>Westiellopsis prolifica</i> ARM 366               |                               |                      | +                              |                     |                         |                  |                             | Jha <i>et al.</i> (1987)                                            |

+, positive effect (increased production); –, negative effect (decreased production); =, no changes.

between the available amounts of phosphate and the production of EPS is not straightforward, as the overall effect might be dependent on a set of interlinked variables such as the amount of phosphate, nitrate and sulphate (Grillo & Gibson, 1979). In most cases, phosphate starvation or low levels of phosphate induced an increase in EPS production (De Philippis *et al.*, 1993; Roux, 1996; Nicolaus *et al.*, 1999; Huang *et al.*, 2007); however, in *C. capsulata*, the absence of phosphate had no significant effect (De Philippis *et al.*, 1991), and in *Anabaena* spp. and *Phormidium* sp., it significantly decreased EPS production (Nicolaus *et al.*, 1999). Generally, an increase in phosphate concentration in the growth medium has little effect on the amount of exopolymers.

### Sulphate

Cyanobacterial EPS contain sulphate groups, a unique feature among bacteria and shared by the EPS produced by archaea and eukaryotes (Sutherland, 1994; De Philippis *et al.*, 1998; De Philippis & Vincenzini, 2003; Micheletti *et al.*, 2008b). It has been reported that sulphur limitation has a dramatic impact on the cells, resulting in morphological and physiological changes similar to those due to nitrogen limitation (Wanner *et al.*, 1986). In *Gloeothece* sp. PCC 6909, sulphur starvation caused significant morphological alterations in the cells, such as the synthesis of a structureless sheath, the accumulation of cyanophycin, polyhydroxybutyrate and glycogen granules and the disintegration of thylakoid membranes. Most of these changes were reversed by the addition of sulphate to the culture (Ortega-Calvo & Stal, 1994; Ariño *et al.*, 1995).

### Salt (NaCl)

The acquisition of salt tolerance in some cyanobacteria living in extreme environments induces various structural and metabolic changes, including a decrease in respiration and an increase in the production of some carbohydrates, notably sucrose, which functions as an osmotic solute protecting membranes from desiccation (Chen *et al.*, 2006). Generally, under salt stress (about 0.5 M), cyanobacteria also produce larger amounts of EPS (Table 5). It has been postulated that the increased export of EPS can have a function equivalent to that of sucrose, i.e. improving salt tolerance and carbohydrate metabolism (Chen *et al.*, 2003). However, some exceptions are reported, in which an increase in NaCl concentration did not affect or even lowered the EPS productivity. In *C. capsulata* (De Philippis *et al.*, 1991) and *Cyanothece* sp. 16Som2 (De Philippis & Vincenzini, 1998), the presence of a thick and firmly attached capsule probably provided enough protection against osmotic shocks, and in *Synechococcus* sp., EPS production increased only in the stationary phase, possibly because a nutrient limitation is necessary for the activation of EPS

production (Roux, 1996). In *Anabaena* sp. ATCC 33047 growing under diazotrophic conditions, EPS production was enhanced only under conditions in which the nitrogenase activity and phycobiliprotein content were low, and production decreased in the presence of higher NaCl concentrations. However, the authors did not provide any explanation for this behaviour (Moreno *et al.*, 1998). In the halophilic cyanobacterium *Aphanothece halophytica* GR02 grown in the presence of various NaCl concentrations, a variation in the relative amounts of rhamnose and galactose, two of the seven monosaccharides constituting the RPS, was observed (Li *et al.*, 2001).

### Aeration

Aeration seems to be vital for increasing the production of EPS by cyanobacteria, with the few studies available reporting that EPS production reached a maximum with continuous aeration (Moreno *et al.*, 1998; Nicolaus *et al.*, 1999; Su *et al.*, 2007). A possible explanation is that the increase in culture turbulence may facilitate the release of the polysaccharides from the cell surface, thus stimulating the synthesis of new exopolysaccharides. However, it is also possible that the higher turbulence due to the aeration provides a better stirring of the viscous cultures, which may increase the light penetration and consequently may induce a higher biosynthetic activity of the cells.

### Temperature

The majority of the studies dealing with the production of EPS in cyanobacteria use the optimal growth temperature for the organism under investigation and, again, the limited data available indicate that the effect of the temperature variation is strain dependent. For *Anabaena* sp. ATCC 33047, an increase in the temperature (from 30/35 to 40/45 °C) led to a noticeable increase in the production of the EPS (Moreno *et al.*, 1998), probably because at higher temperatures, the time required to reach the onset of stationary phase was shorter than that required at 30/35 °C. In contrast, the temperature increase (from 30 to 35 °C) did not affect the EPS productivity in *Nostoc* sp. PCC 7936 (Otero & Vincenzini, 2004), and temperatures > 30 °C even caused a small decrease in EPS production in *Spirulina* sp. (Nicolaus *et al.*, 1999).

### Light

The synthesis and release of EPS are particularly light dependent, even though different light regimens (continuous light and light–dark cycles) do not seem to have a significant effect on the quality of the polymer, i.e. monosaccharidic composition and relative proportions of the sugar units (Vincenzini *et al.*, 1993; De Philippis &

Vincenzini, 1998). However, generally, EPS production is enhanced by continuous light and high light intensities (up to  $400 \mu\text{mol photons m}^{-2} \text{s}^{-1}$ ), but it is important to consider both the culture volume and the geometry of the culture flasks/bioreactors when adjusting the light intensity (see, e.g. Fischer *et al.*, 1997). Moreover, it was demonstrated that certain wavelengths influence EPS production; notably, in the heterocystous *N. commune*, UV-B irradiation stimulates extracellular glycan production as well as induces the synthesis of photoprotective pigments (Ehling-Schulz *et al.*, 1997).

### Other factors

Many other factors that can influence EPS production, notably pH, dilution rate, growth phase, presence/absence of magnesium, calcium, potassium and heavy metals, as well as the addition of glycoxylate, acetate, valerate, glucose, citrate and EDTA have been sporadically studied (Li *et al.*, 2002), but not consistently evaluated.

In summary, although the key factors controlling the production of the cyanobacterial EPS have been identified, comprehensive strain-specific studies taking into account the interaction between the variables to understand the system response to changes, are still missing. This requires a better knowledge of the genes and metabolic pathways involved in the production of EPS in cyanobacteria.

### Genes and biosynthetic pathways related to the production of EPS

Over the past decade, several studies have been initiated to try to understand the genetics and biochemistry of EPS biosynthesis in bacteria (Van Kranenburg *et al.*, 1999; De Vuyst *et al.*, 2001; Jolly & Stinglele, 2001; Laws *et al.*, 2001; Sutherland, 2001; Welman & Maddox, 2003; Whitfield,

2006). However, cyanobacteria have not been thoroughly examined and, consequently, the information available is extremely limited (Yoshimura *et al.*, 2007). Studies performed in both Gram-negative and Gram-positive bacteria revealed that the EPS biosynthetic pathways are very complex, including, besides the enzymes directly involved in the EPS synthesis, enzymes engaged in the formation of the cell wall polysaccharides and lipopolysaccharides (Mozzi *et al.*, 2003). However, the mechanisms involved in the synthesis of EPS are relatively conserved throughout bacteria. Typically, this process comprises four distinct steps occurring in different cellular compartments: (1) the activation of the monosaccharides and conversion into sugar nucleotides in the cytoplasm, (2) the assembly of the repeating units by sequential addition of sugars onto a lipid carrier by glycosyltransferases at the plasma membrane, (3) the polymerization of the repeating units at the periplasmic face of the plasma membrane and (4) the export of the polymer to the cell surface (Yamazaki *et al.*, 1996; De Vuyst & Degeest, 1999; Kleerebezem *et al.*, 1999; Whitfield & Roberts, 1999; De Vuyst *et al.*, 2001; Jolly & Stinglele, 2001; Sutherland, 2001). A schematic representation is depicted in Fig. 1. The sugar activation/modification enzymes and the glycosyltransferases are strain dependent, whereas the proteins involved in the polymerization, chain length control and export are conserved among bacteria. Some of these conserved proteins, as well as their interactions, are highlighted in Fig. 1, and their putative roles are discussed below.

The genes related to the production of surface polysaccharides can be divided into three classes: (1) those encoding the enzymes involved in the biosynthetic pathways of nucleotide sugars, or other components, needed for polysaccharide synthesis and not otherwise available in the cells; (2) those coding for the glycosyltransferases; and (3) those

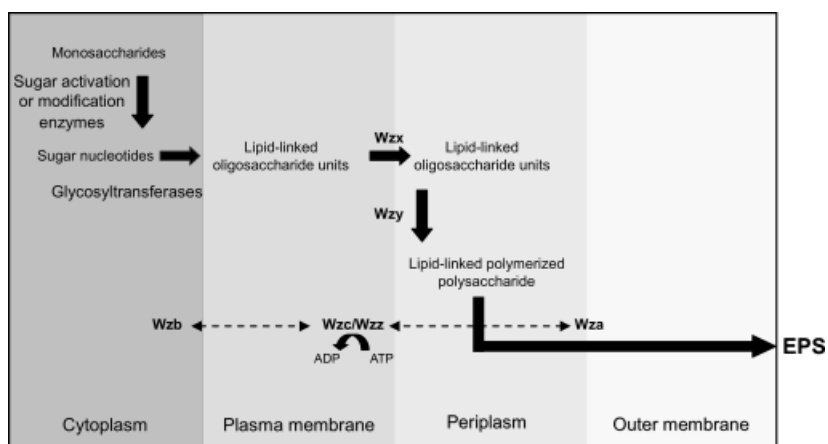

**Fig. 1.** Sequence and compartmentalization of the putative biosynthetic pathway, polymerization and export of EPS in cyanobacteria, based on the information gathered for other bacteria as well as the genes present in the available cyanobacterial genomes. Some of the proteins involved in the polymerization, chain length control and export are highlighted along with the interactions among them (dashed line arrows).

required for the oligosaccharide or polysaccharide processing (Reeves *et al.*, 1996).

The first class is a vast and diverse group of genes not specific for EPS biosynthesis, given that sugar nucleotides are needed for the synthesis of a range of polysaccharides, and this group, therefore, will not be extensively discussed in this work. Among these genes are *rfbABCD*, also frequently called *rml* genes (Reeves *et al.*, 1996), which encode proteins involved in the biosynthesis of L-rhamnose. L-Rhamnose is a 6-deoxyhexose commonly present in bacteria, but only as a component of surface polysaccharides (Li & Reeves, 2000). Indeed, dTDP-rhamnose is commonly found in the EPS of Gram-negative and Gram-positive bacteria (Li & Reeves, 2000) and is a key constituent of the O-antigens of lipopolysaccharides of Gram-negative bacteria (Reeves, 1993). Furthermore, rhamnose is one of the sugars frequently found in the cyanobacterial EPS, and the proteins encoded by the *rfb* genes are listed in CyanoBase (<http://bacteria.kazusa.or.jp/cyanobase/>) as involved in the assembly of cyanobacterial surface polysaccharides. However, the participation of these proteins in the biosynthesis of both lipopolysaccharides and EPS makes it very difficult to determine their specific role. Moreover, the presence of several acidic or neutral monosaccharides in cyanobacterial EPS indicates that their biosynthetic pathway may be even more complex (Sutherland, 2001; Li *et al.*, 2002).

Glycosyltransferases are key enzymes for the biosynthesis of the EPS repeating unit, catalyzing the transfer of the sugar nucleotides from activated donor molecules to specific acceptor molecules – most probably a lipid carrier – in the plasma membrane. A large number of genes encoding glycosyltransferases have been identified, given the structural diversity of the bacterial extracellular polysaccharides, and consequently the number of possible linkages. The diverse function of the transferases, which in addition are strain specific, is reflected in the heterogeneity of their DNA sequences (Reeves *et al.*, 1996; De Vuyst *et al.*, 2001; Jolly & Stinglele, 2001; Samuel & Reeves, 2003). *In silico* analysis of the cyanobacterial genomes revealed the presence of numerous genes putatively encoding glycosyltransferases; however, the enzymes have not been biochemically characterized, which makes it impossible to assign their function to the synthesis of EPS.

In bacteria, the genes encoding the proteins responsible for polymer extension and processing are usually clustered and organized in a similar way (De Vuyst & Degeest, 1999), often constituting long operons. Within these clusters, three different regions can be discerned: a central region constituted by the genes encoding the glycosyltransferases, flanked by two regions comprising the genes encoding enzymes involved in the polysaccharide polymerization, chain length control and export (De Vuyst & Degeest, 1999). The nomenclature of the latter genes is very diverse, for example

being named *eps* and *cps* for lactic acid bacteria, *wz\_* and *kps* for *Escherichia coli*, *exo* for *Sinorhizobium meliloti* and *gum* for *X. campestris* (De Vuyst & Degeest, 1999; De Vuyst *et al.*, 2001; Jolly & Stinglele, 2001; Sutherland, 2001; Welman & Maddox, 2003; Whitfield & Paiment, 2003; Whitfield, 2006). Recently, a region containing 18 ORFs putatively involved in polysaccharide biosynthesis was identified for the cyanobacterium *Anabaena* sp. PCC 7120 (Yoshimura *et al.*, 2007).

Despite the variety of bacterial exopolysaccharides, bacteria use a limited repertoire of assembly and secretion strategies, which are represented in *E. coli* (Whitfield & Roberts, 1999; Whitfield & Paiment, 2003; Whitfield, 2006). For this organism, two models have been proposed for the biosynthesis and assembly of the different types of capsules based on genetic and biochemical criteria, with the one proposed for the capsules of groups 1 and 4 being the most common among Gram-negative bacteria (Rahn *et al.*, 1999; Whitfield, 2006; Whitfield & Larue, 2008). This mechanism is Wzy-dependent, in contrast to the mechanism for groups 2 and 3 capsules, which are assembled via ABC-transporter-dependent pathways (Whitfield, 2006). Using the *E. coli* Wzy-dependent model, together with the information derived from *Anabaena* sp. PCC 7120 (Yoshimura *et al.*, 2007) and the cyanobacterial genome sequences, a putative mechanism was put forward for cyanobacteria (Fig. 2). This is a hypothetical working model, on which further studies aiming to elucidate the mechanisms involved in the production of cyanobacterial EPS can be based. Assuming that a lipid carrier (in most of the Gram-negative bacteria an undecaprenol diphosphate – see Skorupska *et al.*, 2006) is also present in cyanobacteria, the glycosyltransferases will pass the sugar nucleotides to this acceptor, where repeating units are assembled. This step takes place at the interface between the cytoplasm and the plasma membrane. The newly synthesized lipid-linked repeating units are then flipped across the membrane in a process requiring Wzx, an integral plasma membrane protein. This provides the substrate for the blockwise polymerization of the repeating units that takes place at the periplasmic face of the membrane, a step carried out by the Wzy protein. The polymerization also requires the auxiliary protein Wzc to act at the interface between the membrane and the periplasmic space (Skorupska *et al.*, 2006), probably for the control of the chain length of the growing polymer. Transphosphorylation of Wzc and its dephosphorylation by Wzb is required to regulate the polysaccharide polymerization and export. The translocation process is mediated by the outer-membrane auxiliary protein Wza, which forms a channel, allowing the externalization of the growing polysaccharide to the cell surface. The translocation may require the physical association of proteins located in both membranes, notably Wzc and Wza (Whitfield & Paiment, 2003; Skorupska *et al.*, 2006; Whitfield, 2006; Collins & Derrick, 2007).



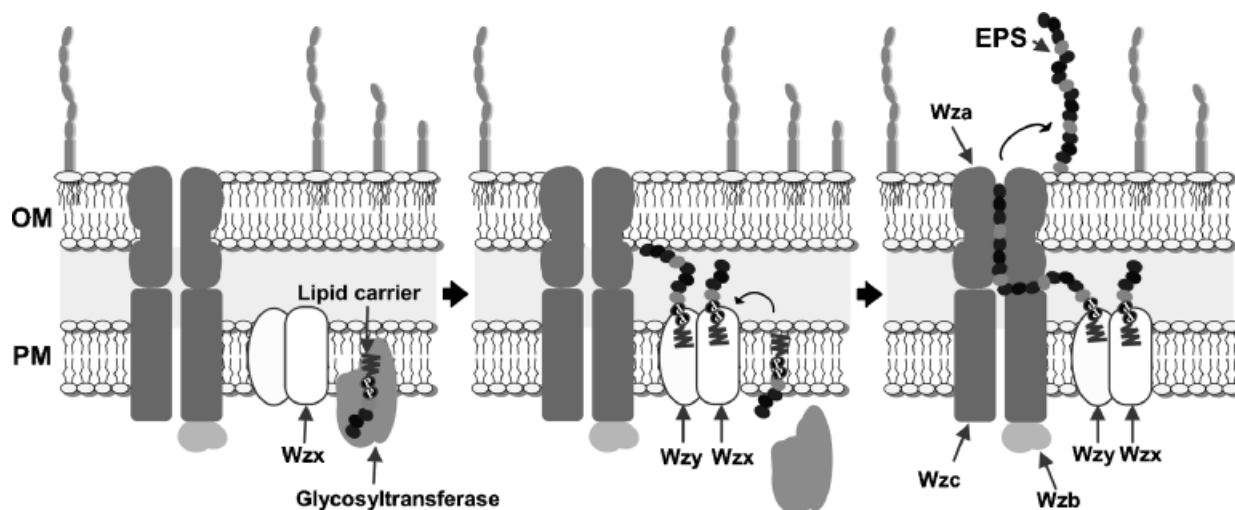

**Fig. 2.** Proposed model for the assembly and export of cyanobacterial EPS based on the information gathered both for other bacteria and genes found in cyanobacterial genomes. (1) Glycosyltransferases transfer the nucleotide sugars onto a putative lipid carrier, and the lipid-linked repeated units are assembled at the interface between the cytoplasm and the plasma membrane. (2) Newly synthesized units are 'flipped' across the membrane in a process requiring the integral membrane protein Wzx. Subsequently, Wzy assembles the polysaccharide by addition of new repeating units to the growing polysaccharide chain. (3) The polymer is translocated in a process requiring the Wzc and Wzb proteins. In the final stage, the carbohydrate polymer is translocated across the outer membrane through the outer-membrane lipoprotein Wza (adapted from Whitfield, 2006). OM, outer membrane; PM, plasma membrane.

An *in silico* analysis of the cyanobacterial genomes revealed that the genes putatively involved in the production of exopolysaccharides are sometimes clustered, present in different regions of the genome, and often occur in multiple copies. This last feature is not common in *E. coli*, *Klebsiella pneumoniae* and lactic acid bacteria, where the genes are frequently clustered and transcribed as one or two operons (Roberts, 1996; De Vuyst & Degeest, 1999; De Vuyst *et al.*, 2001; Jolly & Stingele, 2001; Whitfield & Paiment, 2003; Whitfield, 2006). Examples of the physical organization of *wz\_* genes in three morphologically distinct types of cyanobacteria are depicted in Fig. 3. For the unicellular *Cyanothece* sp. only two copies of each gene were found, with the exception of *wzx*, which appears to be single (its sequence may not be complete). It was not possible to determine the relative position of these genes for this organism as the genome annotation process is still in progress. In general, as the complexity of the organism/size of the genome increases, more copies of the genes putatively involved in the production of the EPS are found, as can be observed for *Lyngbya* sp. and *Nostoc punctiforme*. In the last case, one needs to consider the presence of heterocysts that also have a polysaccharidic layer in their envelope. However, in the filamentous strains, a genome region containing all *wz\_*, except *wzb*, could be identified, but it remains to be shown whether these genes are indeed specifically related to EPS production, and whether they constitute a transcriptional unit. Only by construction of deletion mutants will it be possible

to understand the function of each of the proteins encoded by these ORFs and to start to unveil the biosynthetic pathways of cyanobacterial EPS.

The synthesis and secretion of EPS in cyanobacteria probably follow the pathways previously described for other bacteria. However, as a consequence of the cyanobacteria's ability to perform oxygenic photosynthesis and the unique characteristics of their EPS, some differences are expected. The production of exopolysaccharides is intimately dependent on the balance between the catabolic pathways of sugar degradation and the anabolic pathways of sugar nucleotide synthesis. This balance is certainly different in cyanobacteria compared with heterotrophic bacteria. Moreover, the presence of a higher number of different sugars in cyanobacterial EPS suggests that the synthesis of the sugar nucleotides is more complex, involving a higher number of different enzymatic reactions. In addition, although several genes encoding proteins putatively involved in the Wzy-dependent mechanism of EPS polymerization and export were identified in cyanobacterial genomes, their physical organization differs from what is observed in other microorganisms, suggesting that in cyanobacteria, this mechanism may be under a different type of regulation.

## Concluding remarks

As discussed previously by De Philippis & Vincenzini (1998), the data on the chemical composition and on the

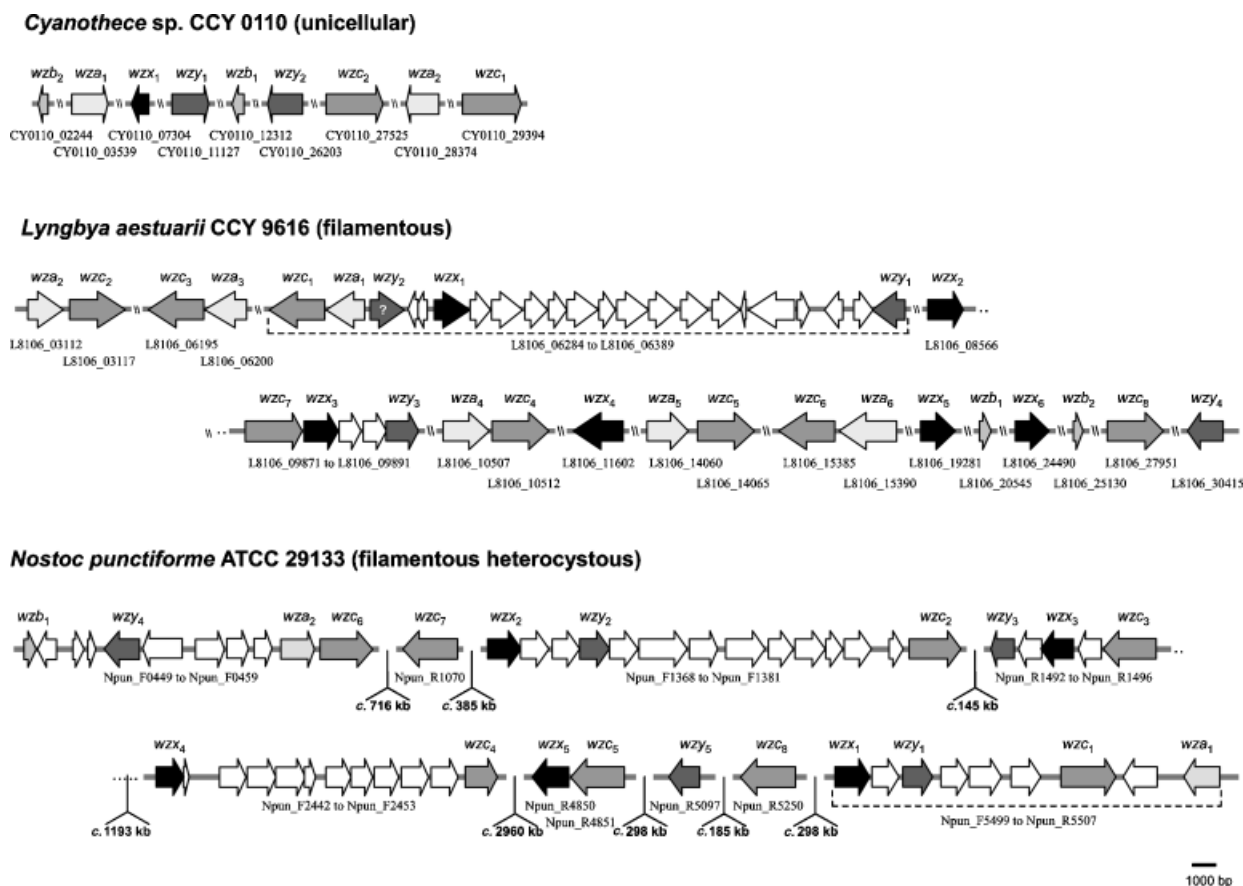

**Fig. 3.** Physical map of the putative genes involved in the polymerization, chain length control and export of EPS in the three morphologically distinct types of cyanobacteria. The deduced protein sequences encoded by these genes were submitted to an *in silico* analysis to identify the conserved motifs of interest. This analysis was performed using the following bioinformatic tools: BLASTP, CDART (at NCBI – <http://www.ncbi.nlm.nih.gov/>), and SMART (at EMBL – <http://smart.embl-heidelberg.de/>). In general, several copies of a specific gene could be identified in a single cyanobacterial strain. In a given organism, the copy that has the highest probability to be related to EPS production in other organisms and the position of the gene in relation to others involved in the same process; the other copies are numbered subsequently. In *Lyngbya* sp. and *Nostoc punctiforme*, the genome region containing all *wz*\_, except *wzb*, is underlined with a dashed line. ? indicates that the gene *wzy2* from *Lyngbya* is the one with the lowest homology to the available *wzy* sequences. Genbank accession numbers: AAXW00000000 (*Cyanothece* sp. CCY 0110), AAVU00000000 (*Lyngbya* sp. PCC 8106) and CP001037 (*N. punctiforme* ATCC 29133).

rheological properties of the cyanobacterial EPS are not always comparable due to the different hydrolytic procedures and analytical methods used. Therefore, some of the results reported in the literature were not included in this review as they were not consistent with the majority of the data available.

The information gathered strongly underlines the complexity of both the chemical features of the cyanobacterial EPS and their putative biosynthetic pathways. As a result, it is not surprising that the data available on the structures of these macromolecules are still scarce and little is known about the genes encoding the proteins involved in their synthesis. Consequently, it is important to generate knowledge to unveil the pathways utilized by cyanobacteria for the

synthesis of these biopolymers, which not only play a decisive ecological role, allowing these organisms to survive in adverse environmental conditions, but also have a high potential for biotechnological applications. The identification of the genes involved in the biosynthesis of EPS would also offer the possibility to investigate (1) the factors regulating the expression of these genes and (2) the possible genetic modification that could be introduced. This will make it possible to maximize the production of the polymer, as well as to introduce specific alterations in the composition/structure, producing polymers more suitable for specific applications. The construction of deletion mutants will help to define the role of each gene product and to clarify the function of EPS in natural habitats.

## Acknowledgements

This work was supported by Fundação Calouste Gulbenkian: Programa Ambiente e Saúde, Proc. No. 76910; FCT (SFRH/BD/22733/2005 and SFRH/BPD/37045/2007), POCI 2010 (III Quadro Comunitário de Apoio) and by Acordo de Cooperação Científica e Tecnológica GRICES/CNR, Proc. 4.1.1., 2007.

## References

- Adhikary SP & Sahu JK (1998) UV protecting pigment of the terrestrial cyanobacterium *Tolypothrix bissoidea*. *J Plant Physiol* **153**: 770–773.
- Arias S, del Moral A, Ferrer MR, Tallon R, Quesada E & Béjar V (2003) Mauran, an exopolysaccharide produced by the halophilic bacterium *Halomonas maura*, with a novel composition and interesting properties for biotechnology. *Extremophiles* **7**: 319–326.
- Ariño X, Ortega-Calvo JJ, Hernandez-Marine M & Saint-Jimenez C (1995) Effect of sulfur starvation on the morphology and ultrastructure of the cyanobacterium *Gloeotheca* sp. PCC 6909. *Arch Microbiol* **163**: 447–453.
- Arskold E, Svensson M, Grage H, Roos S, Radstrom P & van Niel EWJ (2007) Environmental influences on exopolysaccharide formation in *Lactobacillus reuteri* ATCC 55730. *Int J Food Microbiol* **116**: 159–167.
- Bahat-Samet E, Castro-Sowinski S & Okon Y (2004) Arabinose content of extracellular polysaccharide plays a role in cell aggregation of *Azospirillum brasilense*. *FEMS Microbiol Lett* **237**: 195–203.
- Bar-Or Y & Shilo M (1987) Characterization of macromolecular flocculants produced by *Phormidium* sp. strain J-1 and by *Anabaenopsis circularis* PCC 6720. *Appl Environ Microb* **53**: 2226–2230.
- Bellezza S, Albertano P, De Philippis R & Paradossi G (2006) Exopolysaccharides of two cyanobacterial strains from roman hypogea. *Geomicrobiol J* **23**: 301–310.
- Belnap J & Lange OL (2001) Biological soil crusts: characteristics and distribution. *Biological Soil Crusts: Structure, Function and Management* (Belnap J & Lange OL, eds), pp. 3–30. Springer-Verlag, Berlin.
- Bender J, Rodriguez-Eaton S, Ekanemesang UM & Phillips P (1994) Characterization of metal-binding bioflocculants produced by the cyanobacterial component of mixed microbial mats. *Appl Environ Microb* **60**: 2311–2315.
- Benning LG & Mountain BW (2004) The silicification of microorganisms: a comparison between *in situ* experiments in the field and in the laboratory. *11th International Symposium on Water–Rock Interactions* (Wanty R, Seal R & Balkema AA, eds), pp. 3–10. Taylor & Francis, London.
- Benning LG, Phoenix VR, Yee N & Tobin MJ (2004) Molecular characterization of cyanobacterial silicification using synchrotron infrared micro-spectroscopy. *Geochim Cosmochim Acta* **68**: 729–741.
- Bergman B, Gallon JR, Rai AN & Stal LJ (1997) N<sub>2</sub>-fixation by non-heterocystous cyanobacteria. *FEMS Microbiol Rev* **19**: 139–185.
- Bertocchi C, Navarini L & Cesàro A (1990) Polysaccharides from cyanobacteria. *Carbohydr Polym* **12**: 127–153.
- Bishop CT, Adams GA & Hughes EO (1954) A polysaccharide from the blue-green alga, *Anabaena cylindrica*. *Can J Chem* **32**: 999–1003.
- Boels IC, van Kranenburg R, Hugenholtz J, Kleerebezem M & deVos WM (2001) Sugar catabolism and its impact on the biosynthesis and engineering of exopolysaccharide production in lactic acid bacteria. *Int Dairy J* **11**: 723–732.
- Böhm GA, Pfeleiderer W, Boger P & Scherer S (1995) Structure of a novel oligosaccharide–mycosporine–amino acid ultraviolet A/B sunscreen pigment from the terrestrial cyanobacterium *Nostoc commune*. *J Biol Chem* **270**: 8536–8539.
- Brown MJ & Lester JN (1982) Role of bacterial extra-cellular polymers in metal uptake in pure bacterial culture and activated sludge. *Water Res* **16**: 1539–1548.
- Brüll LP, Huang Z, Thomas-Oates JE, Paulsen BS, Cohen EH & Michaelsen TE (2000) Studies of polysaccharides from three edible species of *Nostoc* (cyanobacteria) with different colony morphologies: structural characterization and effect on the complement system of polysaccharides from *Nostoc commune*. *J Phycol* **36**: 871–881.
- Cesàro A, Liut G, Bertocchi C, Navarini L & Urbani R (1990) Physicochemical properties of the exocellular polysaccharide from *Cyanospira capsulata*. *Int J Biol Macromol* **12**: 79–84.
- Chen L, Li D & Liu Y (2003) Salt tolerance of *Microcoleus vaginatus* Gom., a cyanobacterium isolated from desert algal crust, was enhanced by exogenous carbohydrates. *J Arid Environ* **55**: 645–656.
- Chen LZ, Li DH, Song LR, Hu CX, Wang GH & Liu YD (2006) Effects of salt stress on carbohydrate metabolism in desert soil alga *Microcoleus vaginatus* Gom. *J Integr Plant Biol* **48**: 914–919.
- Chi Z, Su CD & Lu WD (2007) A new exopolysaccharide produced by marine *Cyanothece* sp. 113. *Bioresource Technol* **98**: 1329–1332.
- Choi CW, Yoo SA, Oh IH & Park SH (1998) Characterization of an extracellular flocculating substance produced by a planktonic cyanobacterium, *Anabaena* sp. *Biotechnol Lett* **20**: 643–646.
- Collins RF & Derrick JP (2007) Wza: a new structural paradigm for outer membrane secretory proteins? *Trends Microbiol* **15**: 96–100.
- Colombo V, Vieira AAH & Moraes G (2004) Activity of glycosidases from freshwater heterotrophic microorganisms on the degradation of extracellular polysaccharide produced by *Anabaena spiroides* (Cyanobacteria). *Braz J Microbiol* **35**: 110–116.
- Crispim CA & Gaylarde CC (2005) Cyanobacteria and biodeterioration of cultural heritage: a review. *Microb Ecol* **49**: 1–9.

- Cupac S & Gantar M (1992) Chemical composition and morphological structure of the mucilage sheath of the cyanobacterium *Nostoc D*. *Biomed Lett* **47**: 133–138.
- Danin A, Dor I, Sandler A & Amit R (1998) Desert crust morphology and its relations to microbiotic succession at Mt. Sedom, Israel. *J Arid Environ* **38**: 161–174.
- Decho AW (1990) Microbial exopolymer secretions in ocean environments: their role(s) in food webs and marine processes. *Oceanogr Mar Biol* **28**: 73–153.
- De Philippis R & Micheletti E (2009) Heavy metal removal with exopolysaccharide-producing cyanobacteria. *Heavy Metals in the Environment* (Wang LK, Chen JP, Hung YT & Shammas NK, eds), pp. 89–122. CRC Press, Boca Raton, FL.
- De Philippis R & Vincenzini M (1998) Exocellular polysaccharides from cyanobacteria and their possible applications. *FEMS Microbiol Rev* **22**: 151–175.
- De Philippis R & Vincenzini M (2003) Outermost polysaccharidic investments of cyanobacteria: nature, significance and possible applications. *Recent Res Dev Microbiol* **7**: 13–22.
- De Philippis R, Sili C, Tassinato G, Vincenzini M & Materassi R (1991) Effects of growth conditions on exopolysaccharide production by *Cynospira capsulata*. *Bioresource Technol* **38**: 101–104.
- De Philippis R, Margheri MC, Pelosi E & Ventura S (1993) Exopolysaccharide production by a unicellular cyanobacterium isolated from a hypersaline habitat. *J Appl Phycol* **5**: 387–394.
- De Philippis R, Sili C & Vincenzini M (1996) Response of an exopolysaccharide-producing heterocystous cyanobacterium to changes in metabolic carbon flux. *J Appl Phycol* **8**: 275–281.
- De Philippis R, Margheri MC, Materassi R & Vincenzini M (1998) Potential of unicellular cyanobacteria from saline environments as exopolysaccharide producers. *Appl Environ Microb* **64**: 1130–1132.
- De Philippis R, Ena A, Paperi R, Sili C & Vincenzini M (2000) Assessment of the potential of *Nostoc* strains from pasteur culture collection for the production of polysaccharides of applied interest. *J Appl Phycol* **12**: 401–407.
- De Philippis R, Sili C, Paperi R & Vincenzini M (2001) Exopolysaccharide-producing cyanobacteria and their possible exploitation: a review. *J Appl Phycol* **13**: 293–299.
- De Philippis R, Faraloni C, Sili C & Vincenzini M (2005) Populations of exopolysaccharide-producing cyanobacteria and diatoms in the mucilaginous benthic aggregates of the Tyrrhenian Sea (Tuscan Archipelago). *Sci Total Environ* **353**: 360–368.
- De Philippis R, Paperi R & Sili C (2007) Heavy metal sorption by released polysaccharides and whole cultures of two exopolysaccharide-producing cyanobacteria. *Biodegradation* **18**: 181–187.
- De Vuyst L & Degeest B (1999) Heteropolysaccharides from lactic acid bacteria. *FEMS Microbiol Rev* **23**: 153–177.
- De Vuyst L, De Vin F, Vaningelgem F & Degeest B (2001) Recent developments in the biosynthesis and applications of heteropolysaccharides from lactic acid bacteria. *Int Dairy J* **11**: 687–708.
- Dillon JG, Tatsumi CM, Tandingan PG & Castenholz RW (2002) Effect of environmental factors on the synthesis of scytonemin, a UV-screening pigment, in a cyanobacterium (*Chroococidiopsis* sp.). *Arch Microbiol* **177**: 322–331.
- Dudman WF (1977) The role of surface polysaccharides in natural environments. *Surface Carbohydrates of the Prokaryotic Cell* (Sutherland IW, ed), pp. 357–414. Academic Press, New York.
- Dunn JH & Wolk CP (1970) Composition of the cellular envelopes of *Anabaena cylindrica*. *J Bacteriol* **130**: 153–158.
- Ehling-Schulz M & Scherer S (1999) UV protection in cyanobacteria. *Eur J Phycol* **34**: 329–338.
- Ehling-Schulz M, Bilger W & Scherer S (1997) UV-B-induced synthesis of photoprotective pigments and extracellular polysaccharides in the terrestrial cyanobacterium *Nostoc commune*. *J Bacteriol* **179**: 1940–1945.
- Fay P (1992) Oxygen relations of nitrogen fixation in cyanobacteria. *Microbiol Rev* **56**: 340–373.
- Filali Mouhim R, Cornet JF, Fontaine T, Fournet B & Dubertret G (1993) Production, isolation and characterization of the exopolysaccharide of the cyanobacterium *spirulina platensis*. *Biotechnol Lett* **15**: 567–575.
- Fischer D, Schlösser UG & Pohl P (1997) Exopolysaccharide production by cyanobacteria grown in closed photobioreactors and immobilized using white cotton towelling. *J Appl Phycol* **9**: 205–213.
- Fischer SE, Marioli JM & Mori G (2003) Effect of root exudates on the exopolysaccharide composition and the lipopolysaccharide profile of *Azospirillum brasilense* Cd under saline stress. *FEMS Microbiol Lett* **219**: 53–62.
- Flaibani A, Olsen Y & Painter TJ (1989) Polysaccharides in desert reclamation: composition of exocellular proteoglycan complexes produced by filamentous blue-green and unicellular green edaphic algae. *Carbohydr Res* **190**: 235–248.
- Fleming ED & Castenholz RW (2007) Effects of periodic desiccation on the synthesis of the UV-screening compound, scytonemin, in cyanobacteria. *Environ Microbiol* **9**: 1448–1455.
- Fleming ED & Castenholz RW (2008) Effects of nitrogen source on the synthesis of the UV-screening compound, scytonemin, in the cyanobacterium *Nostoc punctiforme* PCC73102. *FEMS Microbiol Ecol* **63**: 301–308.
- Forni C, Telo FR & Caiola MG (1997) Comparative analysis of the polysaccharides produced by different species of *Microcystis* (Chroococcales, Cyanophyta). *Phycologia* **36**: 181–185.
- Fresnedo O & Serra JL (1992) Effect of nitrogen starvation on the biochemistry of *Phormidium laminosum* (Cyanophyceae). *J Phycol* **28**: 786–793.
- Gantar M, Rowell P, Kerby NW & Sutherland IW (1995) Role of extracellular polysaccharide in the colonization of wheat (*Triticum vulgare* L.) roots by N<sub>2</sub>-fixing cyanobacteria. *Biol Fert Soils* **19**: 41–48.

- Garcia-Pichel F & Castenholz RW (1991) Characterization and biological implications of scytonemin, a cyanobacterial sheath pigment. *J Phycol* **27**: 395–409.
- Garozzo D, Impallomeni G, Spina E, Sturiale L, Cesaro A & Cescutti P (1995) Identification of *N*-acetylglucosamine and 4-*O*-[1-carboxyethyl]mannose in the exopolysaccharide from *Cyanospira capsulata*. *Carbohydr Res* **270**: 97–106.
- Garozzo D, Impallomeni G, Spina E & Sturiale L (1998) The structure of the exocellular polysaccharide from the cyanobacterium *Cyanospira capsulata*. *Carbohydr Res* **307**: 113–124.
- Ghosh T, Chattopadhyay K, Marschall M, Karmakar P, Mandal P & Ray B (2009) Focus on antivirally active sulfated polysaccharides: from structure–activity analysis to clinical evaluation. *Glycobiology* **19**: 2–15.
- Girard M & Schaffer-Lequart C (2007) Gelation and resistance to shearing of fermented milk: role of exopolysaccharides. *Int Dairy J* **17**: 666–673.
- Gloaguen V, Morvan H & Hoffmann L (1995) Released and capsular polysaccharides of Oscillatoriaceae (Cyanophyceae, Cyanobacteria). *Alg Studies* **78**: 53–69.
- Gloaguen V, Morvan H, Hoffmann L, Plancke Y, Wieruszkeski JM, Lippens G & Strecker G (1999) Capsular polysaccharide produced by the thermophilic cyanobacterium *Mastigocladus laminosus*. Structural study of an undecasaccharide obtained by lithium degradation. *Eur J Biochem* **266**: 762–770.
- Gouvea SP, Vieira AAH & Lombardi AT (2005) Copper and cadmium complexation by high molecular weight materials of dominant microalgae and of water from a eutrophic reservoir. *Chemosphere* **60**: 1332–1339.
- Grilli Caiola M, Ocampo-Friedmann R & Friedmann EI (1993) Cytology of long-term desiccation in the desert cyanobacterium *Chroococidiopsis* (Chroococcales). *Phycologia* **32**: 315–322.
- Grilli Caiola M, Billi D & Friedmann EI (1996) Effect of desiccation on envelopes of the cyanobacterium *Chroococidiopsis* sp. (Chroococcales). *Eur J Phycol* **31**: 97–105.
- Grillo JF & Gibson J (1979) Regulation of phosphate accumulation in the unicellular cyanobacterium *Synechococcus*. *J Bacteriol* **140**: 508–517.
- Helm RE, Huang Z, Edwards D, Leeson H, Peery W & Potts M (2000) Structural characterization of the released polysaccharide of desiccation-tolerant *Nostoc commune* DRH-1. *J Bacteriol* **182**: 974–982.
- Hill DR, Peat A & Potts M (1994) Biochemistry and structure of the glycan secreted by desiccation-tolerant *Nostoc commune* (Cyanobacteria). *Protoplasma* **182**: 126–148.
- Hoiczky E (1998) Structural and biochemical analysis of the sheath of *Phormidium uncinatum*. *J Bacteriol* **180**: 3923–3932.
- Hoiczky E & Hansel A (2000) Cyanobacterial cell walls: news from an unusual prokaryotic envelope. *J Bacteriol* **182**: 1191–1199.
- Hu C, Liu Y, Paulsen BS, Petersen D & Klaveness D (2003a) Extracellular carbohydrate polymers from five desert soil algae with different cohesion in the stabilization of fine sand grain. *Carbohydr Polym* **54**: 33–42.
- Hu C, Zhang D, Huang Z & Liu YD (2003b) The vertical microdistribution of cyanobacteria and green algae within desert crusts and the development of the algal crusts. *Plant Soil* **257**: 97–111.
- Huang WJ, Lai CH & Cheng YL (2007) Evaluation of extracellular products and mutagenicity in cyanobacteria cultures separated from a eutrophic reservoir. *Sci Total Environ* **377**: 214–223.
- Huang Z, Liu Y, Paulsen BS & Klaveness D (1998) Studies on polysaccharides from three edible species of *Nostoc* (Cyanobacteria) with different colony morphologies: comparison of monosaccharide compositions and viscosities of polysaccharides from field colonies and suspension cultures. *J Phycol* **34**: 962–968.
- Huang Z, Prickett T, Potts M & Helm FR (2000) The use of the 2-aminobenzoic acid tag for oligosaccharide gel electrophoresis. *Carbohydr Res* **328**: 78–83.
- Jensen GS, Ginsberg DI & Deapeau C (2001) Blue-green algae as an immuno-enhancer and biomodulator. *JANA* **3**: 24–30.
- Jha MN, Venkataraman GS & Kaushik BD (1987) Response of *Westiellopsis prolifica* and *Anabaena* sp. to salt stress. *World J Microb Biot* **3**: 307–317.
- Jolly L & Stingle F (2001) Molecular organization and functionality of exopolysaccharide gene clusters in lactic acid bacteria. *Int Dairy J* **11**: 733–745.
- Kabata K, Okamoto C, Sasada N, Ono M, Igoshi K, Kobayashi H, Masuoka C & Ito Y (2005) Studies on the analysis of cultivation conditions and constitutive monosaccharides, and function for food in *Suizenjinori* (*Aphanothece sacrum* (Sur.) Okada) indigenous to Japan. *Proc School Agric Kyushu Tokai Univ* **24**: 37–43.
- Kallas T, Rebière MC, Rippka R & Tandeau de Marsac N (1983) The structural *nif* genes of the cyanobacteria *Gloeotheca* sp. and *Calothrix* sp. share homology with those of *Anabaena* sp., but the *Gloeotheca* genes have a different arrangement. *J Bacteriol* **155**: 427–431.
- Kamal F, Mehrgan H, Assadi MM & Mortazavi SA (2003) Mutagenesis of *Xanthomonas campestris* and selection of strain with enhanced xanthan production. *Iran Biomed J* **7**: 567–572.
- Kawaguchi T & Decho AW (2000) Biochemical characterization of cyanobacterial extracellular polymers (EPS) from modern marine stromatolites. *Prep Biochem Biotech* **30**: 321–330.
- Kawaguchi T & Decho AW (2002) Isolation and biochemical characterization of extracellular polymeric secretions (eps) from modern soft marine stromatolites (bahamas) and its inhibitory effect on CaCO<sub>3</sub> precipitation. *Prep Biochem Biotech* **32**: 51–63.
- Kidron GJ, Yaalon DH & Vonshak A (1999) Two causes for runoff initiation on microbiotic crusts: hydrophobicity and pore clogging. *Soil Sci* **164**: 18–27.
- Kleerebezem M, van Kranenburg R, Tuinier R, Boels IC, Zoon P, Looijesteijn E, Hugenholtz J & de Vos WM (1999) Exopolysaccharides produced by *Lactococcus lactis*: from genetic engineering to improved rheological properties? *Antonie Van Leeuwenhoek* **76**: 357–365.

- Kumar AS, Mody K & Jha B (2007) Bacterial exopolysaccharides – a perception. *J Basic Microb* **47**: 103–117.
- Kumar CG, Joo HS, Choi JW, Koo YM & Chang CS (2004) Purification and characterization of an extracellular polysaccharide from haloalkalophilic *Bacillus* sp. I-450. *Enzyme Microb Tech* **34**: 673–681.
- Lama L, Nicolaus B, Calandrelli V, Manca MC, Romano I & Gambacorta A (1996) Effect of growth conditions on endo- and exopolymer biosynthesis in *Anabaena cylindrica* 10 C. *Phytochemistry* **42**: 655–650.
- Lapasin R, Pricl S, Bertocchi C, Navarini L, Cesàro A & De Philippis R (1992) Rheology of culture broths and exopolysaccharide of *Cyanospira capsulata* at different stages of growth. *Carbohyd Polym* **17**: 1–10.
- Laws A, Gu Y & Marshall V (2001) Biosynthesis, characterization, and design of bacterial exopolysaccharides from lactic acid bacteria. *Biotechnol Adv* **18**: 597–625.
- Leppard GG, Heissenberger A & Herndl GJ (1996) Ultrastructure of marine snow, I: transmission electron microscopy methodology. *Mar Ecol Prog Ser* **135**: 289–298.
- Li P, Liu Z & Xu R (2001) Chemical characterisation of the released polysaccharide from the cyanobacterium *Aphanothece halophytica* GR02. *J Appl Phycol* **13**: 71–77.
- Li P, Harding SE & Liu Z (2002) Cyanobacterial exopolysaccharides: their nature and potential biotechnological applications. *Biotechnol Genet Eng* **18**: 375–404.
- Li Q & Reeves PR (2000) Genetic variation of dTDP-L-rhamnose pathway genes in *Salmonella enterica*. *Microbiology* **146**: 2291–2307.
- Mancuso Nichols CA, Guezennec J & Bowman JP (2005) Bacterial exopolysaccharides from extreme marine environments with special consideration of the southern ocean, sea ice, and deep-sea hydrothermal vents: a review. *Mar Biotechnol* **7**: 253–271.
- Marra M, Palmeri A, Ballio A, Segre A & Slodki ME (1990) Structural characterization of the exocellular polysaccharide from *Cyanospira capsulata*. *Carbohyd Res* **197**: 338–344.
- Matsunaga T, Sudo H, Takemasa H, Wachi Y & Nakamura N (1996) Sulfated extracellular polysaccharide production by the halophilic cyanobacterium *Aphanocapsa halophytia* immobilized on light-diffusing optical fibers. *Appl Microbiol Biotechnol* **45**: 24–27.
- Matulewicz CM, Percival EE & Weigel H (1984) Water-soluble polysaccharides of antarctic and cultured *Phormidium* species of Cyanophyceae. *Phytochemistry* **23**: 103–105.
- Mazor G, Kidron GJ, Vonshak A & Abeliovich A (1996) The role of cyanobacterial exopolysaccharides in structuring desert microbial crusts. *FEMS Microbiol Ecol* **21**: 121–130.
- Mehta VB & Vaidya BS (1978) Cellular and extracellular polysaccharides of the blue-green alga *Nostoc*. *J Exp Bot* **29**: 1423–1430.
- Micheletti E, Colica G, Viti C, Tamagnini P & De Philippis R (2008a) Selectivity in the heavy metal removal by exopolysaccharide-producing cyanobacteria. *J Appl Microbiol* **105**: 88–94.
- Micheletti E, Pereira S, Mannelli F, Moradas-Ferreira P, Tamagnini P & De Philippis R (2008b) Sheathless mutant of the cyanobacterium *Gloeotheca* sp. strain PCC 6909 with increased capacity to remove copper ions from aqueous solutions. *Appl Environ Microb* **74**: 2797–2804.
- Moore BG & Tischer RG (1964) Extracellular polysaccharides of algae: effects on life-support systems. *Science* **145**: 586–587.
- Moore BG & Tischer RG (1965) Biosynthesis of extracellular polysaccharides by the blue-green alga *Anabaena flos-aquae*. *Can J Microbiol* **11**: 877–885.
- Moreno J, Vargas MA, Olivares H, Rivas J & Guerrero MG (1998) Exopolysaccharide production by the cyanobacterium *Anabaena* sp. ATCC 33047 in batch and continuous culture. *J Biotechnol* **60**: 175–182.
- Moreno J, Vargas MA, Madiedo JM, Munoz J, Rivas J & Guerrero MG (2000) Chemical and rheological properties of extracellular polysaccharide produced by the cyanobacterium *Anabaena* sp. ATCC 33047. *Biotechnol Bioeng* **67**: 283–290.
- Morris GA, Li P, Puaud M, Liu Z, Mitchell JR & Harding SE (2001) Hydrodynamic characterisation of the exopolysaccharide from the halophilic cyanobacterium *Aphanothece halophytica* GR02: a comparison with xanthan. *Carbohyd Polym* **44**: 261–268.
- Morvan H, Gloaguen V, Vebret L, Joset F & Hoffmann L (1997) Structure–function investigations on capsular polymers as a necessary step for new biotechnological applications: the case of the cyanobacterium *Mastigocladus laminosus*. *Plant Physiol Bioch* **35**: 671–683.
- Mozzi F, Savoy de Giori G & Font de Valdez G (2003) UDP-galactose 4-epimerase: a key enzyme in exopolysaccharide formation by *Lactobacillus casei* CRL 87 in controlled pH batch cultures. *J Appl Microbiol* **94**: 175–183.
- Navarini L, Bertocchi C, Cesàro A & Lapasin R (1990) Rheology of aqueous solutions of an extracellular polysaccharide from *Cyanospira capsulata*. *Carbohyd Polym* **12**: 169–187.
- Neu TR & Marshall KC (1990) Bacterial polymers: physicochemical aspects of their interactions at interfaces. *J Biomater Appl* **5**: 107–127.
- Neu TR, Dengler T, Jann B & Poralla K (1992) Structural studies of an emulsion-stabilizing exopolysaccharide produced by an adhesive hydrophobic *Rhodococcus* strain. *J Gen Microbiol* **138**: 2531–2537.
- Nicolaus B, Panico A, Lama L, Romano I, Manca MC, De Giulio A & Gambacorta A (1999) Chemical composition and production of exopolysaccharides from representative members of heterocystous and non-heterocystous cyanobacteria. *Phytochemistry* **52**: 639–647.
- Nie ZY, Xia JL & Levert JM (2002) Fractionation and characterization of polysaccharides from cyanobacterium *Spirulina* (*Arthrospira*) *maxima* in nitrogen-limited batch culture. *J Cent South Univ T* **9**: 81–86 (English edition).

- Ortega-Calvo JJ & Stal LJ (1994) Sulphate-limited growth in the N<sub>2</sub>-fixing unicellular cyanobacterium *Gloeotheca* (Nageli) sp. PCC 6909. *New Phytol* **128**: 273–281.
- Otero A & Vincenzini M (2003) Extracellular polysaccharide synthesis by *Nostoc* strains as affected by N source and light intensity. *J Biotechnol* **102**: 143–152.
- Otero A & Vincenzini M (2004) *Nostoc* (Cyanophyceae) goes nude: extracellular polysaccharides serve as a sink for reducing power under unbalanced C/N metabolism. *J Phycol* **40**: 74–81.
- Panhota RS, Bianchini I & Vieira AAH (2007) Glucose uptake and extracellular polysaccharides (EPS) produced by bacterioplankton from an eutrophic tropical reservoir (Barra Bonita, SP-Brazil). *Hydrobiologia* **583**: 223–230.
- Panoff JM, Priem B, Morvan H & Joset F (1988) Sulphated exopolysaccharides produced by two unicellular strains of cyanobacteria, *Synechocystis* PCC 6803 and 6714. *Arch Microbiol* **150**: 558–563.
- Parikh A & Madamwar D (2006) Partial characterization of extracellular polysaccharides from cyanobacteria. *Bioresource Technol* **97**: 1822–1827.
- Parker DL, Schram B, Plude JL & Moore RE (1996) Effect of metal cations on the viscosity of a pectin-like capsular polysaccharide from the cyanobacterium *Microcystis flos-aquae* C3-40. *Appl Environ Microb* **62**: 1208–1213.
- Phoenix VR, Adams DG & Konhauser KO (2000) Cyanobacterial viability during hydrothermal biomineralization. *Chem Geol* **169**: 329–338.
- Piro G, Congedo C, Leucci MR, Lenucci M & Dalessandro G (2005) The biosynthesis of exo- and cell wall-polysaccharides is sensitive to brefeldin A in the cyanobacterium *Leptolyngbya* VRUC 135. *Plant Biosyst* **139**: 107–112.
- Plude JL, Parker DL, Schommer OJ, Timmerman RJ, Hagstrom SA, Joers JM & Hnasko R (1991) Chemical characterization of polysaccharide from the slime layer of the cyanobacterium *Microcystis flos-aquae* C3-40. *Appl Environ Microb* **57**: 1696–1700.
- Potts M (1994) Desiccation tolerance of prokaryotes. *Microbiol Rev* **58**: 755–805.
- Potts M (1999) Mechanisms of desiccation tolerance in cyanobacteria. *Eur J Phycol* **34**: 319–328.
- Potts M (2004) Nudist colonies: a revealing glimpse of cyanobacterial extracellular polysaccharide. *J Phycol* **40**: 1–3.
- Pugh N, Ross A, Elsohly HN, Elsohly MA & Pasco D (2001) Isolation of three high molecular weight polysaccharide preparations with potent immunostimulatory activity from *Spirulina platensis*, *Aphanizomenon flos-aquae* and *Chlorella pyrenoidosa*. *Planta Med* **67**: 737–742.
- Rahn A, Drummelsmith J & Whitfield C (1999) Expression of *Escherichia coli* group 1 K antigens: relationship to the Colanic Acid Biosynthesis Locus and the *cps* Genes from *Klebsiella pneumoniae*. *J Bacteriol* **181**: 2307–2313.
- Raungsomboon S, Amnat C, Boosya B, Duangrat I & Narumon WH (2006) Production, composition and Pb<sup>2+</sup> adsorption characteristics of capsular polysaccharides extracted from a cyanobacterium *Gloeocapsa gelatinosa*. *Water Res* **40**: 3759–3766.
- Reeves PR (1993) Evolution of *Salmonella* O antigen variation by interspecific gene transfer on a large scale. *Trends Genet* **9**: 17–22.
- Reeves PR, Hobbs M, Valvano MA, Skurnik M, Whitfield C, Coplin D, Kido N, Klena J, Maskell D, Raetz CRH & Rick PD (1996) Bacterial polysaccharide synthesis and gene nomenclature. *Trends Microbiol* **4**: 495–503.
- Ricciardi A, Parente E, Crudele MA, Zanetti F, Scolari G & Mannazzu I (2002) Exopolysaccharide production by *Streptococcus thermophilus* SY: production and preliminary characterization of the polymer. *J Appl Microbiol* **92**: 297–306.
- Richert L, Golubic S, Le Guédès R, Ratiskol J, Payri C & Guezennec J (2005) Characterization of exopolysaccharides produced by cyanobacteria isolated from Polynesian microbial mats. *Curr Microbiol* **51**: 379–384.
- Rivera-Aguilar V, Montejano G, Rodríguez-Zaragoza S & Durán-Díaz A (2006) Distribution and composition of cyanobacteria, mosses and lichens of the biological soil crusts of the Tehuacán Valley, Puebla, México. *J Arid Environ* **67**: 208–225.
- Roberts IS (1996) The biochemistry and genetics of capsular polysaccharide production in bacteria. *Annu Rev Microbiol* **50**: 285–315.
- Roux JM (1996) Production of polysaccharide slime by microbial mats in the hypersaline environment of a Western Australian solar saltfield. *Int J Salt Lake Res* **5**: 103–130.
- Ruas-Madiedo P & De los Reyes-Gavilan CG (2005) Invited review: methods for the screening, isolation, and characterization of exopolysaccharides produced by lactic acid bacteria. *J Dairy Sci* **88**: 843–856.
- Ruas-Madiedo P, Hugenholtz J & Zoon P (2002) An overview of the functionality of exopolysaccharides produced by lactic acid bacteria. *Int Dairy J* **12**: 163–171.
- Samuel G & Reeves P (2003) Biosynthesis of O-antigens: genes and pathways involved in nucleotide sugar precursor synthesis and O-antigen assembly. *Carbohydr Res* **338**: 2503–2519.
- Sangar VK & Dugan PR (1972) Polysaccharide produced by *Anacystis nidulans*: its ecological implication. *Appl Microbiol* **24**: 732–734.
- Sasaki GL, Gorin PA, Reis RA, Serrato RV, Elíffo SL & Iacomini M (2005) Carbohydrate, glycolipid, and lipid components from the photobiont (*Scytonema* sp.) of the lichen, *Dictyonema glabratum*. *Carbohydr Res* **340**: 1808–1817.
- Satoh K, Hirai M, Nishio J, Yamaji T, Kashino Y & Koike H (2002) Recovery of photosynthetic systems during rewetting is quite rapid in a terrestrial cyanobacterium, *Nostoc commune*. *Plant Cell Physiol* **43**: 170–176.
- Schaeffer DJ & Krylov VS (2000) Anti-HIV activity of extracts and compounds from algae and cyanobacteria. *Ecotox Environ Safe* **45**: 208–227.
- Scherer S, Ernst A, Chen TW & Böger P (1984) Rewetting of drought-resistant blue-green algae: time course of water uptake and reappearance of respiration, photosynthesis, and nitrogen fixation. *Oecologia* **62**: 418–423.

- Scherer S, Chen TW & Böger P (1986) Recovery of adenine-nucleotide pools in terrestrial blue-green algae after prolonged drought periods. *Oecologia* **68**: 585–588.
- Scott C, Fletcher RL & Bremer GB (1996) Observations of the mechanisms of attachment of some marine fouling blue-green algae. *Biofouling* **10**: 161–173.
- Sekar S & Paulraj P (2006) Strategic mining of cyanobacterial patents from the USPTO patent database and analysis of their scope and implications. *J Appl Phycol* **19**: 277–292.
- Selbmann L, Onofri S, Fenice M, Federici F & Petruccioli M (2002) Production and structural characterization of the exopolysaccharide of the Antarctic fungus *Phoma herbarum* CCFFEE 5080. *Res Microbiol* **153**: 585–592.
- Shah V, Garg N & Madamwar D (1999) Exopolysaccharide production by a marine cyanobacterium *Cyanothece* sp. Application in dye removal by its gelation phenomenon. *Appl Biochem Biotech Part A* **82**: 81–90.
- Shah V, Ray A, Garg N & Madamwar D (2000) Characterization of the extracellular polysaccharide produced by a marine cyanobacterium, *Cyanothece* sp. ATCC 51142, and its exploitation toward metal removal from solutions. *Curr Microbiol* **40**: 274–278.
- Shaw E, Hill DR, Brittain N, Wright DJ, Täuber U, Marand H, Helm RF & Potts M (2003) Unusual water flux in the extracellular polysaccharide of the cyanobacterium *Nostoc commune*. *Appl Environ Microb* **69**: 5679–5684.
- Shepherd R, Rockey J, Sutherland IW & Roller S (1995) Novel bioemulsifiers from microorganisms for use in foods. *J Biotechnol* **40**: 207–217.
- Shirkey B, Kovarcik DP, Wright DJ, Wilmoth G, Prickett TF & Helm RF (2000) Active Fe-containing superoxide dismutase and abundant sodF mRNA in *Nostoc commune* (Cyanobacteria) after years of desiccation. *J Bacteriol* **182**: 189–197.
- Skorupska A, Janczarek M, Marczak M, Mazur A & Król J (2006) Rhizobial exopolysaccharides: genetic control and symbiotic functions. *Microb Cell Fact* **5**: 7.
- Stewart I, Schluter PJ & Shaw GR (2006) Cyanobacterial lipopolysaccharides and human health – a review. *Environ Health* **5**: 7.
- Su C, Zhenming C & Weidong Lu (2007) Optimization of medium and cultivation conditions for enhanced exopolysaccharide yield by marine *Cyanothece* sp. 113. *Chin J Oceanol Limnol* **25**: 411–417.
- Sudo H, Burgess JG, Takemasa H, Nakamura N & Matsunaga T (1995) Sulfated exopolysaccharide production by the halophilic cyanobacterium *Aphanocapsa halophytia*. *Curr Microbiol* **30**: 219–222.
- Sutherland IW (1994) Structure–function relationships in microbial exopolysaccharides. *Biotechnol Adv* **12**: 393–448.
- Sutherland IW (1996) Extracellular polysaccharides. *Biotechnology*, Vol. 6 (Rehm HJ & Reed G, eds), pp. 615–657. VCH, Weinheim.
- Sutherland IW (1999) Polysaccharases for microbial exopolysaccharides. *Carbohydr Polym* **38**: 310–328.
- Sutherland IW (2001) Microbial polysaccharides from Gram-negative bacteria. *Int Dairy J* **11**: 663–674.
- Tamaru Y, Takani Y, Yoshida T & Sakamoto T (2005) Crucial role of extracellular polysaccharides in desiccation and freezing tolerance in the terrestrial cyanobacterium *Nostoc commune*. *Appl Environ Microb* **71**: 7327–7333.
- Tease B, Jurgens UJ, Golecki JR, Heinrich UR, Rippka R & Weckesser J (1991) Fine-structural and chemical analyses on inner and outer sheath of the cyanobacterium *Gloeotheca* sp. PCC 6909. *Antonie Van Leeuwenhoek* **59**: 27–34.
- Tease BE & Walker RW (1987) Comparative composition of the sheath of the cyanobacterium *Gloeotheca* ATCC 27152 cultured with and without combined nitrogen. *J Gen Microbiol* **133**: 3331–3339.
- Tischer RG & Davis EB (1971) The effect of various nitrogen sources upon the production of extracellular polysaccharide by blue-green alga *Anabaena flos-aquae* A 37. *J Exp Bot* **22**: 546–551.
- Tseng CT & Zhao Y (1994) Extraction, purification and identification of polysaccharides of *Spirulina* (*Arthrospira*) *platensis* (Cyanophyceae). *Alg Stud* **75**: 303–312.
- Tsuneda S, Aikawa H, Hayashi H, Yuasa A & Hirata A (2003) Extracellular polymeric substances responsible for bacterial adhesion onto solid surface. *FEMS Microbiol Lett* **223**: 287–292.
- Van Hijum SAFT, Kralj S, Ozimek LK, Dijkhuizen L & Van Geel-Schutten IGH (2006) Structure–function relationships of glucansucrase and fructansucrase enzymes from lactic acid bacteria. *Microbiol Mol Biol R* **70**: 157–176.
- Vaningelgem F, Zamfir M, Mozzi F, Adriany T, Vancanneyt M, Swings J & De Vuyst L (2004) Biodiversity of exopolysaccharides produced by *Streptococcus thermophilus* strains is reflected in their production and their molecular and functional characteristics. *Appl Environ Microb* **70**: 900–912.
- Van Kranenburg R, Boels IC, Kleerebezem M & De Vos WM (1999) Genetics and engineering of microbial exopolysaccharides for food: approaches for the production of existing and novel polysaccharides. *Curr Opin Biotech* **10**: 498–504.
- Vicente-García V, Ríos-Leal E, Calderón-Domínguez G, Cañizares-Villanueva RO & Olvera-Ramírez R (2004) Detection, isolation, and characterization of exopolysaccharide produced by a strain of *Phormidium* 94a isolated from an arid zone of Mexico. *Biotechnol Bioeng* **85**: 306–310.
- Vincenzini M, De Philippis R, Sili C & Materassi R (1990) Studies on exopolysaccharide release by diazotrophic batch cultures of *Cyanospira capsulata*. *Appl Microbiol Biot* **34**: 392–396.
- Vincenzini M, De Philippis R, Sili C & Materassi R (1993) Stability of molecular and rheological properties of the exopolysaccharide produced by *Cyanospira capsulata* cultivated under different growth conditions. *J Appl Phycol* **5**: 539–541.



- Volk RB, Venzke K & Blaschek W (2007) Structural investigation of a polysaccharide released by the cyanobacterium *Nostoc insulare*. *J Appl Phycol* **19**: 255–262.
- Wang WS & Tischer RG (1973) Study of the extracellular polysaccharides produced by a blue-green alga, *Anabaena flos-aquae* A-37. *Arch Microbiol* **91**: 77–81.
- Wanner G, Henkelmann G, Schmidt A & Kost HP (1986) Nitrogen and sulfur starvation of the cyanobacterium *Synechococcus* 6301. An ultrastructural, morphometrical, and biochemical comparison. *Z Naturforsch* **41c**: 741–750.
- Welman AD & Maddox IS (2003) Exopolysaccharides from lactic acid bacteria: perspectives and challenges. *Trends Biotechnol* **21**: 269–274.
- Whitfield C (2006) Biosynthesis and assembly of capsular polysaccharides in *Escherichia coli*. *Annu Rev Biochem* **75**: 39–68.
- Whitfield C & Larue K (2008) Stop and go: regulation of chain length in the biosynthesis of bacterial polysaccharides. *Nat Struct Mol Biol* **15**: 121–123.
- Whitfield C & Paiment A (2003) Biosynthesis and assembly of Group 1 capsular polysaccharides in *Escherichia coli* and related extracellular polysaccharides in other bacteria. *Carbohydr Res* **338**: 2491–2502.
- Whitfield C & Roberts IS (1999) Structure, assembly and regulation of expression of capsules in *Escherichia coli*. *Mol Microbiol* **31**: 1307–1319.
- Whitton BA & Potts M (2000) Introduction to the cyanobacteria. *The Ecology of Cyanobacteria* (Whitton BA & Potts M, eds), pp. 1–11. Kluwer Academic Publishers, Dordrecht.
- Wright DJ, Smith SC, Joardar V, Scherer S, Jervis J, Warren A, Helm RF & Potts M (2005) UV irradiation and desiccation modulate the three-dimensional extracellular matrix of *Nostoc commune* (Cyanobacteria). *J Biol Chem* **280**: 40271–40281.
- Yamazaki M, Thorne L, Mikolajczak M, Armentrout RW & Pollock TJ (1996) Linkage of genes essential for synthesis of a polysaccharide capsule in *Sphingomonas* strain S88. *J Bacteriol* **178**: 2676–2687.
- Yoshimura H, Okamoto S, Tsumuraya Y & Ohmori M (2007) Group 3 sigma factor gene, *sigJ*, a key regulator of desiccation tolerance, regulates the synthesis of extracellular polysaccharide in cyanobacterium *Anabaena* sp. strain PCC 7120. *DNA Res* **14**: 13–24.
- Zhang YM, Wang HL, Wang XQ, Yang WK & Zhang DY (2006) The microstructure of microbiotic crust and its influence on wind erosion for a sandy soil surface in the Gurbantunggut Desert of Northwestern China. *Geoderma* **132**: 441–449.
